# A computational model explains and predicts substantia nigra pars reticulata responses to pallidal and striatal inputs

Ryan S. Phillips<sup>1,3</sup>, Ian Rosner<sup>2,3</sup>, Aryn H. Gittis<sup>2,3</sup>, Jonathan E. Rubin<sup>1,3</sup>

\*For correspondence:  
[jonrubin@pitt.edu](mailto:jonrubin@pitt.edu) (JER)

<sup>1</sup>Department of Mathematics, University of Pittsburgh; <sup>2</sup>Department of Biological Sciences, Carnegie Mellon University; <sup>3</sup>Center for the Neural Basis of Cognition, Pittsburgh, PA

**Abstract** As a rodent basal ganglia (BG) output nucleus, the substantia nigra pars reticulata (SNr) is well positioned to impact behavior. SNr neurons receive GABAergic inputs from the striatum (direct pathway) and globus pallidus (GPe, indirect pathway). Dominant theories of action selection rely on these pathways' inhibitory actions. Yet, experimental results on SNr responses to these inputs are limited and include excitatory effects. Our study combines experimental and computational work to characterize, explain, and make predictions about these pathways. We observe diverse SNr responses to stimulation of SNr-projecting striatal and GPe neurons, including biphasic and excitatory effects, which our modeling shows can be explained by intracellular chloride processing. Our work predicts that ongoing GPe activity could tune the SNr operating mode, including its responses in decision-making scenarios, and GPe output may modulate synchrony and low-frequency oscillations of SNr neurons, which we confirm using optogenetic stimulation of GPe terminals within the SNr.

## Introduction

The substantia nigra pars reticulata (SNr) is the primary output nucleus of the rodent basal ganglia (BG) and hence likely plays a key role in the behavioral functions, such as decision-making and action selection, suppression, or tuning, to which the BG contribute. The SNr exhibits intrinsic spiking activity, resulting in ongoing GABAergic outputs to specific thalamic sites, which are believed to suppress unwanted or spurious movements. While the literature on signal transmission through the basal ganglia emphasizes the projection from the subthalamic nucleus to the SNr, the SNr also receives converging GABA<sub>A</sub>-receptor mediated synaptic inputs associated with the two major transmission channels through the BG, the direct and indirect pathways. Thus, the behavioral influence of the BG is ultimately regulated by how the SNr integrates these inputs.

Although dominant theories of action selection strongly rely on the inhibitory actions of these pathways on SNr, the details of this integration process have not been thoroughly investigated and remain poorly understood. Interestingly, the inputs to SNr from the two pathways feature distinct characteristics. Indirect pathway GABAergic projections to SNr arise from the external segment of the globus pallidus (GPe), which engages in tonic spiking activity; occur via basket-like synapses around the soma of SNr neurons; and exhibit short-term depression. Direct pathway inputs are delivered by striatal (Str) neurons, which spike much more sparsely; are located on distal

40 dendrites; and exhibit short-term facilitation (*Smith and Bolam, 1991; Von Krosigk et al., 1992;*  
41 *Connelly et al., 2010; Lavian and Korngreen, 2016*). The complexity of how these aspects interact  
42 may have hindered the study of the convergence of these inputs to the SNr, yet there may be an  
43 additional, easily overlooked factor influencing the process as well: GABA dynamics (*Raimondo*  
44 *et al., 2012; Doyon et al., 2011, 2016b*). The ongoing activity of GPe neurons would likely induce a  
45 large tonic chloride load on SNr neurons, potentially depolarizing the GABA reversal potential,  $E_{GABA}$ .  
46 Although striatal inputs are less frequent, their impacts would be affected by chloride accumulation,  
47 which could be exaggerated in smaller dendritic compartments, and by associated variability of  
48  $E_{GABA}$ . Indeed, past studies have reported  $E_{GABA}$  values that vary over a relatively wide range, from  
49 -80 to -55 mV, in SNr (*Giorgi et al., 2007; Connelly et al., 2010; Higgs and Wilson, 2016; Simmons*  
50 *et al., 2018*). Moreover, earlier experiments showed excitatory effects along with inhibitory ones  
51 from stimulation of SNr-projecting Str neurons *in vivo* (*Freeze et al., 2013*), which could relate to  
52 chloride regulation as well.

53 To study this complex combination of effects and their possible functional consequences, we  
54 developed a computational model of an SNr neuron including somatic and dendritic compartments  
55 and the corresponding GABAergic inputs as well as the dynamics of intracellular chloride and  
56  $E_{GABA}$ . We used this model to investigate the influence of GABAergic synaptic transmission from  
57 GPe, Str, and SNr collaterals on SNr activity under behaviorally relevant conditions. We found  
58 that with the inclusion of short-term synaptic plasticity tuned to fit previous data, the model's  
59 dynamics matched a range of experimental findings on SNr firing patterns, including our own new  
60 results from optogenetic stimulation in mice. Given this agreement, we used the model to generate  
61 novel predictions about how direct and indirect pathway inputs may shape SNr activity patterns  
62 in functional settings involving both pathways. Specifically, we predict that variations in the level  
63 of GPe activity could interact with sparse SNr reciprocal interconnectivity to provide an effective  
64 mechanism to tune SNr synchrony and the emergence of low-frequency oscillations, and we present  
65 experimental data based on optogenetic stimulation of GABAergic GPe terminals in the SNr that  
66 provides evidence of this effect. We also predict that ongoing high-frequency GPe activity could  
67 serve a modulatory role in action selection by adjusting the effectiveness of lower-frequency direct  
68 pathway Str signals at pausing SNr outputs to downstream targets, as would be needed to allow  
69 action selection. The convergence of multiple GABA<sub>A</sub> receptor-mediated synaptic input streams  
70 onto individual neurons, such as pyramidal neurons in cortex, represents a common scenario in  
71 neural circuitry, and our results suggest that intracellular  $Cl^-$  levels should also be considered in  
72 analyzing the integration of GABAergic inputs by neurons in brain regions beyond the SNr.

## 73 Results

### 74 Conductance-Based SNr Model

75 Due to the positioning of the SNr within the BG, synaptic integration of GABAergic projections  
76 from the direct (Str) and indirect (GPe) pathways in the SNr is likely a critical factor in BG function.  
77 Nonetheless, the effects of these two pathways on SNr activity are not well understood. Complicat-  
78 ing matters, GPe and Str inputs form synapses on disparate locations on SNr neurons, undergo  
79 distinct short-term synaptic plasticity and likely have differing susceptibilities to breakdown of  $E_{GABA}$ ,  
80 mediated by the  $Cl^-$  load. Therefore, to investigate synaptic integration of GPe and Str GABAergic  
81 inputs to the SNr in more detail, we constructed a conductance-based neuron model with somatic  
82 and dendritic compartments (Fig. 1). The two compartments are electrically coupled and intra-  
83 cellular  $Cl^-$  concentration ( $[Cl^-]_i$ ) is maintained in each compartment by the potassium-chloride  
84 co-transporter (KCC2). The baseline firing rate ( $\approx 10Hz$ ) and properties of the model are tuned to  
85 match experimental data (*Richards et al., 1997; Atherton and Bevan, 2005; Yanovsky et al., 2006;*  
86 *Zhou et al., 2008*). For a full model description see Methods.



**Figure 1.** Two-compartment SNr model neuron includes currents that affect  $[Cl^-]_i$  and produces appropriate dynamics. (A) Schematic diagram of the model. (B) Tonic spiking voltage traces for both compartments, with minimum voltages labeled. (C) Model f-I curve. (D) Phase plot of the rate of change of the membrane potential ( $dV_m/dt$ ) against the membrane potential ( $V_m$ ) showing afterhyperpolarization (AHP) and spike height (AP Peak) for both compartments. The baseline firing rate is tuned to match data from *in vitro* mouse and rat slice recordings (Richards *et al.*, 1997; Atherton and Bevan, 2005; Yanovsky *et al.*, 2006; Zhou *et al.*, 2008)

### 87 Short-term synaptic depression and facilitation of GPe and Str synaptic projections

88 The GABAergic synapses from the GPe and Str neurons undergo short-term synaptic depression  
 89 and facilitation, respectively. To decide how to implement and tune these effects in our model,  
 90 we turned to the experimental literature. Two studies reported on short-term plasticity of GPe  
 91 and Str projections in *in vitro* slice preparations (Connelly *et al.*, 2010; Lavian and Korngreen, 2016).  
 92 Because this data was averaged over multiple neurons and trials, we incorporated an established  
 93 mean-field model of short-term synaptic depression/facilitation (Abbott *et al.*, 1997; Dayan and  
 94 Abbott, 2001; Morrison *et al.*, 2008) into our simulated synaptic currents to capture short-term  
 95 synaptic dynamics in our simulations.

96 Interestingly, the two experimental papers reported results that superficially appear to be  
 97 at odds with each other. In Connelly *et al.* (2010), the magnitude of synaptic depression and  
 98 facilitation of synapses onto SNr neurons was found to be largely independent of the tested  
 99 stimulation frequencies (10 Hz, 50 Hz, 100 Hz). In contrast, in a BG output nucleus analogous to the  
 100 SNr, the entopeduncular nucleus (EP), a similar characterization of the short-term synaptic dynamics  
 101 of GPe and Str projections found that short-term depression and facilitation are highly frequency-  
 102 dependent (Lavian and Korngreen, 2016). Moreover, the magnitude of synaptic facilitation of Str  
 103 projections was shown to decrease in the EP for stimulation frequencies above 10 Hz.

104 A critical distinction between these studies is that data was collected under a voltage-clamp  
 105 configuration in Connelly *et al.* (2010) and under a current-clamp configuration in Lavian and Korn-  
 106 green (2016). Under current-clamp, the membrane potential ( $V_m$ ) is free to change. Consequently,  
 107 stimulation of GPe or Str projections hyperpolarizes  $V_m$  towards the GABAergic reversal potential  
 108 ( $E_{GABA}$ ), which reduces the GABAergic driving force ( $V_m - E_{GABA}$ ) and ultimately decreases the mag-  
 109 nitude of the inhibitory postsynaptic potential (IPSP). In contrast, the GABAergic driving force does  
 110 not change under voltage-clamp, as  $V_m$  is fixed. In both voltage- and current-clamp  $E_{GABA}$  may also  
 111 be considered fixed due to the whole cell configuration and free ionic diffusion between the cell and  
 112 recording pipette. Based on these considerations, we tuned our model to match the voltage-clamp



**Figure 2.** Simulated short-term synaptic depression and facilitation of GABAergic synapses originating from GPe neurons of the indirect pathway (A & B) and Str neurons of the direct pathway (C & D) under voltage clamp. For the GPe and Str simulations, the left traces (A & C) show current and right panels (B & D) show the paired pulse ratios (PPR) resulting from repeated synaptic stimulation at different frequencies. The amplitude of each IPSC ( $P_n$ ) was normalized to the amplitude of the first evoked IPSC ( $P_1$ ). For this set of simulations the membrane potential was held at  $V_S = -60.0\text{ mV}$  and  $E_{GABA}$  for the somatic and dendritic compartments was held fixed at  $-72\text{ mV}$ . Model parameters and behavior were tuned to match voltage-clamp data from (Connolly et al., 2010).

113 data from Connolly et al. (2010), as it is likely a better representation of the underlying short-term  
 114 synaptic dynamics of GPe and Str inputs (Fig. 2). Interestingly, with this tuning, the short-term GPe  
 115 and Str synaptic dynamics in our model when tested under current-clamp also reproduces the  
 116 synaptic dynamics reported in Lavian and Korngreen (2016). Specifically, GPe synaptic depression  
 117 and Str synaptic facilitation are strongly frequency dependent, and the magnitude of synaptic  
 118 facilitation in Str synapses decreases for stimulation frequencies above 10 Hz (Fig. 3). These results  
 119 demonstrate the importance of considering the differences between voltage- and current-clamp  
 120 recordings when characterizing short-term synaptic dynamics. Additionally, these findings suggest  
 121 that short-term synaptic dynamics of inputs from GPe and Str in the EP are tuned in a similar way  
 122 to those in the SNr.



**Figure 3.** Simulated short-term synaptic depression and facilitation of GABAergic synapses originating from GPe neurons of the indirect pathway (A & B) and Str neurons of the direct pathway (C & D) under current clamp. For the GPe and Str simulations, the left traces (A & C) show voltage and right panels (B & D) show the paired pulse ratios (PPR) resulting from repeated synaptic stimulation at different frequencies. The amplitude of each IPSP ( $P_n$ ) was normalized to the amplitude of the first evoked IPSP ( $P_1$ ). For this set of simulations the  $I_{APP}$  applied in order to set the resting membrane of the somatic compartment at  $V_S = -60.0$  mV. In both compartments  $E_{GABA}$  was held fixed at  $-72$  mV. Model performance is qualitatively, and somewhat quantitatively, similar to experimental current-clamp data ((Lavian and Korngreen, 2016), Figs. 2-3).

### 123 SNr responses to simulated stimulation of GPe and Str inputs depend on $E_{GABA}$ 124 and intracellular $Cl^-$ levels

125 Next, we used our model to consider effects of variability of the GABA reversal potential on SNr  
126 responses to its GABAergic inputs. Maintenance of the  $Cl^-$  gradient is largely determined by a  
127 neuron's ability to preserve a low intracellular chloride concentration ( $[Cl^-]_i$ ), which in turn depends  
128 on the balance of the neuron's capacity for  $Cl^-$  extrusion by the potassium-chloride co-transporter  
129 KCC2 (Doyon et al., 2011; Raimondo et al., 2012; Doyon et al., 2016b; Mahadevan and Woodin,  
130 2016) and the  $Cl^-$  influx into the neuron that occurs through  $Cl^-$ -permeable ion channels that  
131 contribute to  $I_{GABA}$ .

132 Due to the importance of  $Cl^-$  regulation in GABAergic synaptic transmission, we first character-  
133 ized the relationship among a conductance associated with a tonic chloride load ( $g_{GABA}^{Tonic}$ ), the  $Cl^-$   
134 extrusion capacity ( $g_{KCC2}$ ), and  $E_{GABA}$  in the somatic compartment of our model (Fig. 4 A). We found  
135 that  $E_{GABA}$  may vary from approximately  $-80$  mV with very low net  $Cl^-$  influx to approximately  
136  $-45$  mV with high  $g_{GABA}^{Tonic}$  and low  $Cl^-$  extrusion capacity (note that the level of depolarization of  
137  $E_{GABA}$  is also influenced by the  $HCO_3^-$  concentration gradient across the cell membrane (Kaila

138 *and Voipio, 1987; Kaila et al., 1989; Staley et al., 1995; Staley and Proctor, 1999; Raimondo et al.,*  
 139 **2012**); see Methods, Eq. 23). Importantly, depending on  $g_{GABA}^{Tonic}$  and  $g_{KCC2}$ ,  $E_{GABA}$  can vary over ranges  
 140 that correspond to excitatory, inhibitory and shunting effects of the resulting GABAergic current  
 141 even for relatively small  $g_{GABA}^{Tonic}$ .  
 142 Next, we investigated the effect of simulated somatic GABAergic projections from the GPe on  
 143 the firing rate of the model SNr neuron. This was achieved by simulating optogenetic stimulation  
 144 of the model's somatic synapses at 40 Hz for 1 s. Four distinct types of SNr firing rate responses  
 145 were observed: "complete inhibition", "no effect", "excitation", and "partial inhibition" (Fig. 4 B-E).  
 146 Additionally, two sub-types of partial inhibition occurred: (1) deletion of one or a few spikes  
 147 followed by a step reduction in firing rate (Fig. 4 E1) and (2) complete inhibition followed by a late  
 148 escape and continuation of spiking (Fig. 4 E2). The type of response in the model depends on the  
 149 magnitude of  $E_{GABA}$  relative to  $V_m$  at the start of the stimulation, and, in the case of the second  
 150 type of partial inhibition, the slow depolarizing drift of  $E_{GABA}$  that is the result of intracellular  $Cl^-$   
 151 accumulation. The effects of the short-term synaptic depression at these synapses on most of  
 152 the SNr responses turns out to be minimal. This lack of effect arises because these synapses  
 153 reach steady-state level of depression after approximately five stimulus pulses, which occurs after  
 154 just 125.0 ms when stimulating at 40 Hz. The one exception occurs with the first type of partial  
 155 inhibition, for which  $g_{GABA}$  is large enough at the start of the stimulation window to cause an early  
 156 spike deletion, after which depression can allow the reduced-rate firing to emerge.



**Figure 4.** Tonic chloride conductance and extrusion capacity determine somatic  $E_{GABA}$  and SNr responses to simulated 40 Hz GPe stimulation. (A) Dependence of somatic  $E_{GABA}$  on the tonic chloride conductance ( $g_{GABA}^{Tonic}$ ) and the potassium-chloride co-transporter KCC2 extrusion capacity ( $g_{KCC2}$ ). (B-E) Examples of SNr responses to simulated indirect pathway stimulation at different positions in the 2D ( $g_{GABA}^{Tonic}, g_{KCC2}$ ) parameter space, as labeled in the top left panel. (E1 & E2) Notice the two distinct types of partial inhibition. Inset highlights the drift in  $E_{GABA}$  during stimulation.

157 We next performed a parallel analysis of the effects of simulated optogenetic stimulation of Str  
158 GABAergic projections in the dendritic compartment of the SNr model under the same stimulation  
159 protocol. As with the somatic compartment, we first characterized the relationship among  $g_{GABA}^{Tonic}$ ,  
160  $g_{KCC2}$  and  $E_{GABA}$  in the dendritic compartment and found that  $E_{GABA}$  varies over a comparable  
161 range ( $-80\text{ mV}$  to  $-45\text{ mV}$ ), depending on the balance of  $Cl^-$  influx and extrusion rates (Fig. 5 A).  
162 Stimulation of the dendritic GABAergic synapses resulted in the same four response types seen  
163 in the somatic compartment with an additional “biphasic inhibitory-to-excitatory” response and a  
164 slightly different pair of “partial inhibition” responses (Fig. 5 B-F), one mediated by the short-term  
165 facilitation of direct pathway synapses. Specifically, with repeated stimulation, the strengthening of  
166 these synapses can induce a gradual slowing in the SNr firing rate throughout the simulation, which  
167 may eventually stop neuronal spiking (Fig. 5 E1). Despite this facilitation, a form of partial inhibition  
168 consisting of an initial pause in SNr spiking followed by a recovery of spiking can also occur in  
169 the model with direct pathway stimulation, mediated by a sufficiently large  $Cl^-$  accumulation to  
170 allow the effects of dynamic  $E_{GABA}$  to dominate the post-synaptic response (Fig. 5 E2). The biphasic  
171 inhibitory-to-excitatory response type is an extreme case of the partial inhibition shown in Fig. 5 E2.  
172 This biphasic response occurs when  $E_{GABA}$  is initially hyperpolarized relative to  $V_m$ , the Str GABAergic  
173 conductance is strong and the  $Cl^-$  extrusion capacity is weak, which allows for unusually rapid  $Cl^-$   
174 accumulation and subsequent depolarization of  $E_{GABA}$  near or above the action potential threshold.  
175 The biphasic response type is predicted to occur with Str but not GPe stimulation, due to the larger  
176 surface area-to-volume ratio and concomitant increased susceptibility to  $Cl^-$  accumulation in the  
177 dendritic compartment that Str inputs target, relative to the soma.



**Figure 5.** Tonic chloride conductance and extrusion capacity determine dendritic  $E_{GABA}$  and SNr responses to 20 Hz Str stimulation. (A) Dependence of somatic  $E_{GABA}$  on the tonic chloride conductance ( $g_{GABA}^{Tonic}$ ) and the potassium-chloride co-transporter KCC2 extrusion capacity ( $g_{KCC2}$ ). (B-F) Examples of SNr responses to simulated indirect pathway stimulation at different locations in the 2D ( $g_{GABA}^{Tonic}$ ,  $g_{KCC2}$ ) parameter space.  $g_{GABA}^{Tonic}$  and  $g_{KCC2}$  for each example are indicated in the top left panel. (E1 & E2) Notice the two distinct types of partial inhibition. Inset highlights the drift in  $E_{GABA}$  during stimulation. (F) Example of a biphasic inhibition-to-excitation response elicited by increasing the stimulation frequency to 40 Hz under the same conditions shown in E2. Alternatively, same response could be elicited by increasing the synaptic weight ( $W_{GABA}^{Str}$ ).

## 178 **Optogenetic stimulation of GPe and Str GABAergic synaptic terminals in the SNr** 179 **results in diverse neuronal responses**

180 Our simulations in the previous sections predict that GABAergic inputs from the GPe and Str may  
181 produce a diverse range of effects on SNr activity depending on  $E_{GABA}$  and  $[Cl]_i$  levels and dynamics.  
182 To test these predictions, we optogenetically stimulated the synaptic terminals from D1 striatal  
183 neurons of the direct pathway and from GPe neurons of the indirect pathway in the SNr for 10 s  
184 periods. During stimulation, we performed patch clamp recordings of SNr activity. Experiments  
185 were conducted in *in vitro* slice preparations and patch clamp recordings were performed in  
186 cell attached mode to avoid perturbing the intracellular  $Cl^-$  concentration critical for GABAergic  
187 signaling. In response to optogenetic stimulation, we found a wide array of SNr response types,  
188 which we classified into five categories: (1) complete inhibition - cessation of spiking; (2) partial  
189 inhibition - sufficient reduction of firing rate with or without a pause; (3) no effect - no change in  
190 firing rate; (4) excitation - sufficient increase in firing rate; and (5) biphasic - decrease or pause in  
191 spiking followed by an increase in firing rate above baseline. Example traces for the response types  
192 observed with GPe and Str stimulation are shown in Fig. 6A1 & B1, and the frequencies of occurrence  
193 for these responses are quantified in Fig. 6A2 & B2; see also Supplemental Figures S1 and S2 for  
194 raster plots and firing rate time courses for all frequencies tested. All response types could be  
195 induced by optogenetic stimulation of the GPe or the Str projection; however, with GPe stimulation,  
196 biphasic responses were slower to emerge (see Supplemental Figure S1) and less common overall

197 than with Str stimulation, consistent with the absence of biphasic responses in our 1 s simulations  
198 of GPe inputs and with slower  $Cl^-$  accumulation, over several seconds, in the soma than in the  
199 dendrite. In a portion of the neurons partially inhibited by GPe or Str stimulation, the duration of  
200 the pause in spiking is longer than can be explained by short-term synaptic dynamics. Additionally,  
201 the number of partially inhibited neurons with a “long pause” increases with stimulation frequency  
202 (GPe:10 Hz, 1/25; 20 Hz, 8/26; 40 Hz, 13/29; 60 Hz, 16/24; Str:10 Hz, 1/25; 20 Hz, 8/26; 40 Hz, 13/29;  
203 60 Hz, 16/24). Moreover, the strength of GPe and Str synaptic inhibition gradually decreased over  
204 the 10 s stimulation period Fig. 6A3 & B3. These findings, in addition to the observation of biphasic  
205 responses, are consistent with gradual  $Cl^-$  accumulation and depolarization of  $E_{GABA}$  during the  
206 stimulation period.



**Figure 6.** Characterization of experimentally observed SNr responses to optogenetic stimulation of (top) GPe and (bottom) Str projections to SNr *in vitro*. (A1 & B1) Examples of response types observed for 10s stimulation of GPe or Str projections. (A2 & B2) Quantification types of SNr response to optogenetic stimulation at varying frequencies. (A3 & B3) Effect of GPe or Str stimulation on the firing rate of SNr neurons averaged across all trials for stimulation at 40 Hz. Error bars indicate the standard deviation. The 10 s stimulation period was broken into 1 s intervals to show the gradual weakening of inhibition during stimulation.

207 Previous computational modeling studies that have shown that, due to the larger surface area-  
208 to-volume ratio of dendrites relative to the soma,  $Cl^-$  accumulation and depolarization of  $E_{GABA}$   
209 is faster in dendritic compared to somatic compartments (Doyon et al., 2011; Ratté and Prescott,  
210 2011), and this result could explain why biphasic responses were only seen with Str stimulation.  
211 Nonetheless,  $Cl^-$  accumulation and depolarization of  $E_{GABA}$  may still arise, on a slower time scale,  
212 with stimulation of the indirect pathway. If slow  $Cl^-$  accumulation and depolarization of  $E_{GABA}$  are  
213 indeed occurring, then the strength of inhibition should slowly weaken during stimulation, which  
214 will result in a slow increase in firing rate during the stimulation period.

215 Measurements of spiking frequency relative to baseline during and after stimulation of the GPe  
216 and Str projections as a function of stimulation frequency (Fig. 6E & F) support the idea that  $E_{GABA}$   
217 dynamics may contribute to synaptic integration within the SNr. For this analysis, we divided the  
218 stimulation period into thirds in order to assess any dynamic changes in the strength of the input  
219 over the course of stimulation. We found that Str projections are initially more effective at inhibiting  
220 SNr spiking relative to GPe projections (Str: 72.3 – 76.7% peak reduction, GPe: 43.1 – 61.9% peak  
221 reduction). Interestingly, for both GPe and Str projections, the strength of inhibition decreases on  
222 average during the stimulation period, consistent with slow accumulation of intracellular chloride.  
223 Moreover, the loss of firing rate reduction was most prominent for Str stimulation at high frequency,  
224 despite short-term synaptic facilitation known to occur at these synapses (Connelly et al., 2010;  
225 Lavian and Korngreen, 2016), consistent with the emergence of some excitatory and biphasic SNr  
226 responses in that regime.

227 The diversity of experimental responses to GPe and Str stimulation seen in Fig. 6 support the  
228 idea that GABAergic synaptic transmission in the SNr is not purely inhibitory and may even be  
229 excitatory in some neurons. In the following sections we return to our computational model to  
230 explore the functional significance of this finding in physiologically relevant settings.

### 231 $E_{GABA}$ tunes local SNr synchrony and may promote slow oscillations

232 In addition to receiving GABAergic projections from the GPe and Str, SNr neurons interact locally  
233 through  $GABA_A$ -mediated synaptic transmission (Maily et al., 2003; Brown et al., 2014; Higgs and  
234 Wilson, 2016). The role of these synapses is unclear; however, they have been proposed to regulate  
235 synchronization of SNr activity (Higgs and Wilson, 2016). Levels of  $E_{GABA}$  will affect the strength  
236 and polarity (inhibitory, shunting, excitatory) of these interactions. Therefore, we next used our  
237 computational model to characterize how variations in  $E_{GABA}$ , potentially due to differences in GPe  
238 firing rates, affect these local SNr interactions.

239 On average, a given SNr neuron receives GABAergic synaptic projections from 1-4 neighboring  
240 SNr neurons (Higgs and Wilson, 2016). Consequently, synaptic interactions between SNr neurons  
241 result in brief synaptic transients that have been proposed to impact neuronal synchrony incremen-  
242 tally by changing the oscillatory phase of the post-synaptic neuron. Therefore, we first characterized  
243 how transient GABAergic stimulation modulates the phase of our model SNr neuron as a function of  
244 the phase of the SNr oscillation at which the stimulation occurs, using phase response curves (PRCs)  
245 (Ermentrout, 1996; Ermentrout and Terman, 2010) computed for an array of values of  $E_{GABA}$  (see  
246 Fig. 7). The PRCs that we obtained for hyperpolarized values of  $E_{GABA}$  are qualitatively consistent  
247 with those found previously for mouse SNr neurons in brain slices with  $E_{GABA} \approx -65mV$  (Simmons  
248 et al., 2018).



**Figure 7.** Phase response curves (PRCs) of the model SNr neuron depend on  $E_{GABA}$ . (A & B) Example traces illustrating the effect of a single GABAergic synaptic input on the phase of spiking in a simulated SNr neuron for hyperpolarized and depolarized  $E_{GABA}$ , respectively. (C) For an ongoing voltage oscillation of a spiking SNr neuron (blue trace), we define a phase variable as progressing from 0 immediately after a spike to 1 at the peak of a spike. As  $E_{GABA}$  is varied from  $-60\text{ mV}$  to  $-50\text{ mV}$ , progressively more of the SNr voltage trace lies below  $E_{GABA}$ , where GABAergic inputs have depolarizing effects. (D) PRCs computed for a model SNr neuron in response to GABAergic input stimuli arriving at different phases of an ongoing SNr oscillation. As  $E_{GABA}$  is varied from  $-60\text{ mV}$  to  $-50\text{ mV}$ , the PRC transitions from a curve showing a delay of the next spike for most stimulus arrival phases, through some biphasic regimes, to a curve showing an advance of the next spike for almost all possible phases. In panel D, the A and B labels at approximately 0.5 phase on the  $E_{GABA} = -60\text{ mV}$  and  $E_{GABA} = -50\text{ mV}$  PRCs correspond to the examples shown in panels A and B. The conductance of the synaptic input was fixed at  $0.1\text{ nS/pF}$  in order to produce deflections in  $V_m$  for hyperpolarized  $E_{GABA}$  that are consistent with data presented in *Higgs and Wilson (2016)*.

249 PRCs can be used to predict the synchrony between two oscillating neurons that interact  
 250 synaptically (*Ermentrout, 1996; Jeong and Gutkin, 2007; Ermentrout and Terman, 2010; Smeal*  
 251 *et al., 2010*). We applied this idea with our computationally-generated PRCs to predict the synchrony  
 252 in a network of two SNr neurons under two configurations, unidirectional and bidirectional synaptic  
 253 connectivity (Fig. 8). For the unidirectional case a first, presynaptic SNr neuron stimulates a second,  
 254 postsynaptic one. Phases of the presynaptic neuron's ongoing oscillation at which the firing of the  
 255 postsynaptic neuron will become locked can be predicted by finding locations where the PRC crosses  
 256 the horizontal (phase) axis. Although all crossings represent fixed points and hence phases at which  
 257 locking can theoretically occur, only those with a positive slope are stable and are predicted to arise  
 258 robustly and be observed in simulations (e.g., (*Ermentrout, 1996; Ermentrout and Terman, 2010*)).  
 259 By tracking the fixed points, we found that in the unidirectional case, the locked phase relation  
 260 between the two SNr neurons is predicted to go from synchrony, or phase 0, to progressively more  
 261 asynchronous phase locking and then back toward synchrony again as  $E_{GABA}$  depolarizes from  
 262  $-60\text{ mV}$  to  $-50\text{ mV}$ , with perfectly anti-phase spiking for  $E_{GABA} \approx -53\text{ mV}$  (Fig. 8 A4). We also observe  
 263 that phase locking is predicted to be unstable (indicated by open circles) for sufficiently negative  
 264  $E_{GABA}$  (less than  $\approx -57\text{ mV}$ ).

265 To test these predictions computationally, we simulated the unidirectionally connected two-

266 neuron network and recorded difference in the timing of spikes in neuron 2 relative to the phase  
267 of neuron 1 (phase difference). We found that the predicted synchrony/asynchrony is in good  
268 agreement with our simulations, and is indicated by the distributions of phase difference histograms  
269 shown in Fig. 8 A4 (gray curves). Interestingly, for relatively hyperpolarized  $E_{GABA}$  where synchronous  
270 phase locking is predicted to be unstable we observe that, instead of phase locking, slow oscillations  
271 in the phase of the postsynaptic neuron relative to that of presynaptic neuron begin to emerge.  
272 Correspondingly, the distribution of presynaptic neuron phases when the postsynaptic neuron  
273 fires spreads out across the [0,1] interval and the frequency of firing of neuron the postsynaptic  
274 neuron repeatedly drifts below that of the presynaptic neuron, at a rate of about 1 Hz (Fig. 8 A5).  
275 The mechanism underlying these slow oscillations will be discussed in more detail below.

276 For bidirectional connectivity, we no longer have a clear distinction between a pre- and a  
277 postsynaptic neuron, and instead we just refer to neuron 1 and neuron 2. Due to the symmetry  
278 of the network, we can plot the PRC for neuron 1 together with that of neuron 2 by reflecting the  
279 PRC for neuron 2 about the mid-point of the phase axis, 0.5 (see Methods for more detail). Phase  
280 locking between the two neurons can then be predicted by finding the intersections (fixed points)  
281 of these two PRCs (Fig. 8 B1-B3). By symmetry, approximately 0.5 is always a fixed point in this case,  
282 and we found that this was the only fixed point for the bidirectional system and remained stable  
283 regardless of the value of  $E_{GABA}$  (Fig. 8B1-4). Again, this prediction was tested by simulating the  
284 bidirectionally connected two-neuron network and recording the phase difference between the  
285 two neurons. The predicted asynchrony between the two neurons is in good agreement with our  
286 simulations, in which the phase difference between the two neurons remained tightly distributed  
287 around 0.5 for all values of  $E_{GABA}$  tested (Fig. 8 B4).



**Figure 8.** Effect of  $E_{GABA}$  on SNr synchrony in a unidirectional (left) and bidirectional (right) synaptically connected two-neuron network. (A1-A3 & B1-B3) Identification of PRC fixed points as a function of  $E_{GABA}$ . Recall that positive changes in phase correspond to delays. (A1,B1)  $E_{GABA} = -60$  mV; (A2,B2)  $E_{GABA} = -56$  mV; (A3,B3)  $E_{GABA} = -50$  mV. Black dots indicate dataset used to generate PRC in red/blue. Stable and unstable fixed points are indicated by green and white filled circles, respectively. For reference, all PRCs and fixed points are included in gray for all values of  $E_{GABA}$  tested. (A4,B4) Effect of  $E_{GABA}$  on SNr phase locking. Gray histograms show the distribution of the difference in the timing of spikes in neuron 2 relative to the phase of neuron 1 (phase difference) for the two network simulations for different levels of  $E_{GABA}$ . Green and white filled circles indicate the stable and unstable locking predicted by analysis of PRCs. Note the unstable fixed points for the lowest values of  $E_{GABA}$  in the unidirectional case. (A5) In the unidirectional case, slow 1 Hz oscillations in the frequency of neuron 2 arise due to phase slipping at hyperpolarized values of  $E_{GABA}$ .

288 The slow oscillations of approximately  $1\text{ Hz}$  seen with unidirectional connectivity can be un-  
289 derstood by taking a closer look at the PRCs calculated for  $E_{GABA}$  less than approximately  $-57\text{ mV}$   
290 in the unidirectional case (Fig. 8 A). For these values of  $E_{GABA}$ , the PRCs only have unstable fixed  
291 points. Under these conditions, the phase of neuron 2 relative to neuron 1 is delayed by different  
292 amounts across successive inputs from neuron 2 (or possibly advanced if inputs arrive during a  
293 specific narrow phase window). Moreover, based on the shape of the PRC, the magnitude of change  
294 in phase is large when phase is away from 0 and  $1$ , such that spiking is asynchronous, and small  
295 when the phase is nearly synchronous. As a result, the network remains close to synchrony most  
296 of the time but with approximately periodic asynchronous excursions, a phenomenon referred to  
297 as phase slipping (Thounaojam *et al.*, 2014). The frequency of phase slipping is determined by the  
298 number of stimulus kicks needed for the phase to progress through one full cycle, which in turn  
299 is determined by the shape of the PRC. For example, one full phase slipping cycle is illustrated in  
300 Fig. 9 A-B for  $E_{GABA} = -60\text{ mV}$ . As previously mentioned, the slow oscillation in phase is also seen as  
301 a periodic negative excursion in the frequency of spiking (Fig. 8 A5).

302 Finally, since the frequency of phase slipping oscillations is determined by the shape of the PRC  
303 and the PRC is in part determined both by  $E_{GABA}$  and by the weight/conductance of the synaptic  
304 projection from the other neuron ( $W_{GABA}^{SNr}$ ), changes in  $E_{GABA}$  or  $W_{GABA}^{SNr}$  should affect the phase  
305 slipping frequency. Therefore, we also characterized the relationship between  $E_{GABA}$  and the fre-  
306 quency of the phase slipping for different values of  $W_{GABA}^{SNr}$ . In our simulations, we found that phase  
307 slipping oscillations begin at approximately  $E_{GABA} = -56\text{ mV}$  and linearly increase in frequency as  
308  $E_{GABA}$  is held at progressively more hyperpolarized values (Fig. 9 C). The hyperpolarization of  $E_{GABA}$   
309 leads to stronger inhibition and hence a larger PRC amplitude, which allows for the postsynaptic  
310 neuron to progress through the full phase range on fewer cycles (i.e., at a higher frequency). More-  
311 over, the slope of the linear relationship between  $E_{GABA}$  and frequency increases/decreases with  
312 increases/decreases in the strength of  $W_{GABA}^{SNr}$  due to similar effects. We also simulated SNr neurons  
313 with different levels of applied current, leading to different firing rates, but this variability did not  
314 strongly impact resulting oscillation frequencies.



**Figure 9.** Characterization of phase slipping oscillations in the unidirectionally connected two-neuron network. (A) Illustration of the phase of the postsynaptic neuron at the moment when it receives each input from the presynaptic neuron (input phase) for the unidirectionally connected two neuron network as a function of time for  $E_{GABA} = -60 mV$ . Dots denote phases of the presynaptic neuron when the postsynaptic neuron spikes. The phase value of 1 corresponds to the postsynaptic neuron being at spike threshold. Insets show the timing of the presynaptic neuron spike (black triangle/dashed line), the phase of the postsynaptic neuron spike after it receives the input (blue), and the spike train of the postsynaptic neuron in the absence of input (gray). The red cycle is used in B. (B) Overlay of the PRC generated for  $E_{GABA} = -60 mV$  and the resulting progression of phase for one full phase slipping oscillation. Light gray dots indicate the data points used to generate the blue PRC. Recall that positive changes in phase correspond to delays. (C) The frequency of phase slipping increases as  $E_{GABA}$  decreases, with a steeper relationship for larger synaptic weight ( $W_{GABA}^{SNr}$ ) between the SNr neurons.

### 315 **Optogenetic stimulation of GPe neurons suppresses SNr oscillations**

316 Slow oscillations have been reported in the SNr *in vivo* under dopamine depleted (DD) conditions in  
 317 lightly anaesthetized (Walters et al., 2007) and awake behaving animals (Whalen et al., 2020). Our  
 318 simulations predict that similar slow oscillations will occur when  $E_{GABA}$  is equal to or hyperpolarized  
 319 relative to the membrane AHP. Assuming that these oscillations are driven by the mechanism  
 320 described in Fig. 9, manipulations that depolarize  $E_{GABA}$  should reduce and stop such oscillations.  
 321 As illustrated in Fig. 4, changing the tonic  $Cl^-$  conductance to the soma is one way to depolarize  
 322  $E_{GABA}$ . This could be achieved by increasing the firing rate of GPe neurons. Therefore, next we  
 323 examined if these slow oscillations are suppressed by optogenetic stimulation of GPe neurons in  
 324 the SNr. Consistent with previous descriptions (Walters et al., 2007; Whalen et al., 2020), under DD  
 325 conditions we found slow oscillations in the firing rates of SNr neurons (Fig. 10 A-C). The frequency  
 326 of the oscillations was characterized by finding the peak in the power spectral density (PSD) as  
 327 described in Whalen et al. (2020) and shown in Fig. 10 B. We identified five oscillatory units with  
 328 frequencies ranging from 1.46 Hz to 1.95 Hz (mean  $\pm$  SD =  $1.7 \pm 0.204$  Hz, Fig. 10 C). In these units,  
 329 optogenetic stimulation of GPe terminals in the SNr had limited effect on SNr firing rates during a  
 330 30 s stimulation period (Fig 10 D; see Materials and Methods for a full description of the experimental

331 preparation and stimulation protocol). Yet, stimulation of GPe terminals in the SNr significantly  
332 reduced the power in the PSD in the 0.25-4.0  $Hz$  band (Fig. 10 E). The impact of GPe stimulation  
333 on oscillations but not firing rate in the SNr is consistent with our simulations and suggests that  
334 slow oscillations in the SNr seen under DD conditions may be due to the phase slipping mechanism  
335 described in Fig. 9. These data also suggest that a role of the GPe may be to tune SNr dynamics by  
336 modulating the tonic  $Cl^-$  conductance and  $E_{GABA}$  in the SNr.



**Figure 10.** Slow oscillations in the SNr seen under dopamine depleted conditions *in vivo* are suppressed by channelrhodopsin-2 optogenetic stimulation of GABAergic GPe terminals in the SNr. (A-B) Example (A) raster plot and (B) power spectrum of a single spiking unit in SNr without (blue) and with (red) optogenetic stimulation of GPe terminals over multiple trials. (C) Frequencies of slow oscillations in the 12 unit dataset before optogenetic stimulation. (D) Distribution of single unit firing rates without (blue) and with (red) optogenetic stimulation for all recorded units ( $n=12$ ). Notice that stimulation has no significant effect on firing rate (t-test  $p=0.8531$ ). (E) Band power ( $0.75 - 3.0$  Hz) without (blue) and with (red) optogenetic stimulation for oscillatory units ( $n=5$ ). Solid blue and red horizontal bars indicate mean band power. Notice that stimulation significantly reduces the power of the slow oscillations (t-test  $p=0.0341$ ).

337  $E_{GABA}$  tunes the strength of direct pathway inhibition and may affect response  
 338 times in perceptual decision-making tasks

339 In tasks involving perceptual decision-making, visual motor responses (saccades) are thought to be  
 340 triggered when evidence accumulates above some threshold level. Experiments suggest that the

341 BG is involved in regulating the dynamics of these visual motor responses (*Basso and Wurtz, 2002*;  
342 *Basso et al., 2005*; *Shires et al., 2010*; *Sato and Hikosaka, 2002*). In the BG, evidence accumulation  
343 is thought to be represented by a ramping increase in the firing rate in striatal neurons of the direct  
344 pathway (*Ding and Gold, 2010*) that, above some threshold, generates a pause in SNr activity (*Wei*  
345 *et al., 2015*; *Dunovan et al., 2019*). The pause in SNr spiking disinhibits downstream motor targets  
346 and allows the initiation of a selected action. As we have shown above, the effect(s) of striatal  
347 inputs on the firing rate and pattern of SNr neurons is highly dependent on  $E_{GABA}$ , which, in turn, is  
348 determined by the tonic chloride conductance and the  $Cl^-$  extrusion capacity of the KCC2 pump.  
349 Therefore, changes in  $E_{GABA}$  are predicted to modulate the threshold at which ramping striatal  
350 activity will generate a pause in SNr firing.

351 In the previous section we argued that the tonic GABAergic input from GPe neurons of the direct  
352 pathway may provide a mechanism to tune  $E_{GABA}$  in the soma of SNr neurons. Assuming that the  
353 coupling between the somatic and dendritic compartments is sufficiently strong, the tonic somatic  
354  $Cl^-$  conductance provided by GPe inputs may also tune  $E_{GABA}$  in the dendritic compartment. To  
355 illustrate this idea, we first constructed a population of 100 SNr neurons with a baseline firing rate  
356 turned up to  $\approx 25$  Hz in order to better represent *in vivo* conditions (*Freeze et al., 2013*; *Mastro et al.,*  
357 *2017*; *Willard et al., 2019*) (Fig. 11 A, B). In this set of simulations  $[Cl^-]$  in the somatic and dendritic  
358 compartments interact by the addition of a coupling term (see Methods for a full description).  
359 Next, we characterized  $E_{GABA}$  in the somatic and dendritic compartments as a function of the  
360 tonic somatic  $Cl^-$  conductance (representing the tonic GABAergic GPe input). As expected,  $E_{GABA}$   
361 depolarizes in both compartments as the somatic chloride conductance is increased (Fig. 11 C). In  
362 the dendritic compartment in particular,  $E_{GABA}$  ranges from just below  $-75$  mV with no chloride  
363 conductance to approximately  $-57$  mV with a  $1.0$  nS/pF  $Cl^-$  conductance in the soma.

364 Finally, we characterized the relationship between tonic  $Cl^-$  conductance and the time required  
365 to decrease the mean SNr population firing rate below thresholds of 1 Hz, 5 Hz, and 10 Hz in  
366 response to a ramping striatal input (Fig. 11 D-F). As the tonic  $Cl^-$  conductance increases,  $E_{GABA}$   
367 becomes less hyperpolarizing (Fig. 5) and hence more time is needed to push SNr activity below  
368 threshold; for high enough  $Cl^-$  conductance, the ramping striatal input is unable to suppress SNr  
369 firing below 1 Hz. These simulations illustrate a plausible mechanism through which the tonic  
370  $Cl^-$  conductance provided by the level of GPe activity may be able to tune dendritic (and somatic)  
371  $E_{GABA}$ , altering SNr responses to direct pathway striatal inputs and, ultimately, the response times  
372 in perceptual decision-making tasks.



**Figure 11.** Tonic somatic  $Cl^-$  conductance affects somatic and dendritic  $E_{GABA}$  and tune SNr responses to Str inputs. (A) Raster plot of spikes in the simulation of an SNr network model containing 50 simulated neurons that receive tonic somatic inhibition from GPe projections. (B) Integrated SNr population activity gives a mean firing rate of about 23 Hz, as seen *in vivo* conditions (Freeze et al., 2013; Mastro et al., 2017; Willard et al., 2019). (C) Increasing tonic  $Cl^-$  depolarizes somatic and dendritic  $E_{GABA}$ . (D) Ramping Str mean firing rate used to represent evidence accumulation in a perceptual decision-making task. (E) Inhibition and pause generation in the SNr during evidence accumulation/ramping Str activity, for two different tonic somatic  $Cl^-$  conductance. (F) Increasing the tonic  $Cl^-$  conductance lengthens  $T_{pause}$ , the time for the SNr firing rate to drop below threshold (colors correspond to threshold levels in E). If the tonic conductance becomes too great, then SNr firing cannot be pushed to arbitrarily low rates.

## Discussion

373

374 In this work, we used computational modeling to explain and make predictions about the responses  
 375 of SNr neurons to the streams of GABAergic input that they receive from the GPe and striatum (Str),  
 376 as well as the effects of local interactions within the SNr. Results from previous experiments and  
 377 from those reported in this paper show that each of these channels, when activated on its own, can  
 378 induce diverse patterns of SNr spiking. Our simulations show that these responses can result from  
 379 varying levels of the GABA<sub>A</sub> reversal potential, short-term plasticity, and in some cases intracellular  
 380  $Cl^-$  dynamics. GPe neurons, with somatic synapses on SNr neurons and relatively high sustained  
 381 firing rates (Chan et al., 2005; Surmeier et al., 2005; Mastro et al., 2014; Abdi et al., 2015; Deister  
 382 et al., 2012), are well positioned to influence  $E_{GABA}$  in the SNr and hence to impact SNr processing  
 383 of GABAergic inputs from other sources. In particular, our results predict that changes in baseline  
 384 GPe output will modulate the synchrony between SNr neurons coupled through local GABAergic  
 385 collaterals and can induce or suppress low frequency oscillations in SNr firing. We present data from  
 386 experiments involving optogenetic stimulation of GPe terminals in SNr supporting this prediction.  
 387 Moreover, we find that GPe outputs should be able to tune the effectiveness of GABAergic inputs to  
 388 the SNr from the Str, which may impact the timing of decisions released by pauses in SNr firing.

389 From a naive perspective, the excitatory and biphasic inhibitory-to-excitatory SNr responses  
 390 that we observed following stimulation of GPe and Str projections are surprising, since GABAergic  
 391 synapses are typically considered as inhibitory and the slice preparation used in our experiments  
 392 largely eliminates the possibility of disinhibitory network effects. Excitatory and biphasic GABAergic  
 393 effects are not unprecedented, however, as they have been reported in other brain regions (Haam  
 394 et al., 2012; Astorga et al., 2015). Furthermore, from a theoretical perspective, these GABAergic  
 395 responses are relatively well understood (see (Dayan and Abbott, 2001; Doyon et al., 2011, 2016a,b)

## GPe GABAergic Output to the SNr



**Figure 12.** Summary figure/cartoon - GPe output provides tonic Cl load tuning SNr synchrony and the strength of Str inhibition

396 for reviews). The direction (inhibitory versus excitatory) of the GABAergic current ( $I_{GABA}$ ) depends  
 397 on the value of  $E_{GABA}$  relative to the membrane potential ( $V_m$ ) when GABA<sub>A</sub> receptors are activated.  
 398 As such, excitatory responses are expected to result from a GABAergic reversal potential ( $E_{GABA}$ )  
 399 that is depolarized close to or above the action potential threshold of a given neuron, while biphasic  
 400 inhibitory-to-excitatory responses are expected to be mediated by a relatively rapid  $Cl^-$  accumu-  
 401 lation and ongoing depolarization of  $E_{GABA}$  during the arrival of GABAergic inputs, which may be  
 402 accelerated in small dendritic compartments. In keeping with this idea, stimulation of striatal inputs  
 403 to SNr in mouse brain slices at a slower rate of 2Hz yielded consistent initial inhibitory effects  
 404 rather than the diversity of SNr responses we observed (Simmons et al., 2018). It is also possible  
 405 that sustained stimulation of GPe and Str terminals may yield slow short-term depression that  
 406 contributes to gradual changes in SNr firing rates, but this would not explain the biphasic SNr  
 407 responses. Similarly, inhibition could recruit additional currents that are activated by hyperpolar-  
 408 ization, such as low voltage-activated  $Ca^{2+}$ , persistent sodium, or hyperpolarization-activated  
 409 cyclic nucleotide-gated (HCN) channels, for example. A subset of these currents could theoretically  
 410 combine to explain the biphasic but not the purely excitatory responses.

411 As one possible implication of depolarization of  $E_{GABA}$ , experiments in rodent epilepsy models  
 412 have revealed that seizure-like events are preceded by surges in interneuron activity that depolarize  
 413  $E_{GABA}$ , sparking a positive feedback loop that can result in runaway activity (Lillis et al., 2012;  
 414 Kaila et al., 2014). Interestingly,  $E_{GABA}$  has been found to exhibit a strong sensitivity to changes  
 415 in factors that can affect  $Cl^-$  levels (Kaila et al., 2014) some of which, such as KCC2-mediated  $Cl^-$   
 416 extrusion (Sivakumaran et al., 2015; Moore et al., 2017; Schulte et al., 2018; Titz et al., 2015), may  
 417 be tunable by cellular signaling pathways (Titz et al., 2015). According to our model, compromised  
 418 KCC2 function would likely depolarize  $E_{GABA}$ , slowing or even preventing decision-making. More  
 419 generally, our results support the idea that GPe output itself could be modulated to tune SNr  
 420 processing, related to decision speeds or other functions, in condition-specific ways (see Figure 12).

421 Our experiments characterizing SNr responses to optogenetic stimulation of GPe and Str GABAer-  
 422 gic projections were done in *in vitro* slice preparations. In general, the measured value of  $E_{GABA}$   
 423 is thought to be hyperpolarized in *in vitro* slice preparations relative to *in vivo* conditions (Doyon

424 *et al., 2011, 2016a,b*). This difference is predicted to arise due to decreased excitability in slice  
425 preparations and severed synaptic projections, which result in an overall reduction of synaptic  
426 transmission and, consequently, reduced tonic chloride conductance/load. Applying this idea to the  
427 SNr,  $E_{GABA}$  should be depolarized in *in vivo* relative to *in vitro* conditions. Values of  $E_{GABA}$  measured  
428 in the SNr *in vitro* typically range between  $-75\text{ mV}$  and  $-60\text{ mV}$  (*Connelly et al., 2010; Higgs and*  
429 *Wilson, 2016; Simmons et al., 2018*) although values as high as  $-55\text{ mV}$  have been reported (*Giorgi*  
430 *et al., 2007*) in some conditions. Because spiking in the SNr is asynchronous in control animals  
431 (*Deransart et al., 2003; Willard et al., 2019*), our model would predict that  $E_{GABA}$  should be close to  
432  $-55\text{ mV}$  *in vivo* (Fig. 8 A4). If  $E_{GABA}$  is depolarized *in vivo* we would also expect to see an increase in  
433 the number of SNr neurons that have excitatory responses to optogenetic stimulation of GABAergic  
434 projections from GPe neurons of the indirect pathway and Str projections from the direct pathway,  
435 relative to our results *in vitro* (Fig. 6). Consistent with this prediction, previous *in vivo* experiments  
436 (*Freeze et al., 2013*) found that optogenetic stimulation of D1 Str neurons resulted in excitatory  
437 responses in 55% (15 of 27) of SNr neurons.

438 The impact of GABAergic inputs from GPe on synchrony within SNr predicted by our model is  
439 consistent with a previous study that examined the effect of  $E_{GABA}$  on dynamics of a bidirectionally  
440 coupled neuron pair *Jeong and Gutkin (2007)*. The previous work also exploited PRCs for its analysis  
441 but was done using simpler models, in the context of weak coupling, and did not consider the  
442 unidirectional case. In fact, given the sparsity of synaptic collaterals within SNr *Simmons et al.*  
443 *(2018)*, we expect that unidirectional connectivity between SNr neurons would be the dominant  
444 motif observed. Thus, our model suggests that GPe firing rates could tune the level of synchrony in  
445 SNr, with oscillations emerging when  $E_{GABA}$  is below the afterhyperpolarization potential.

446 The oscillations that we predict will arise in SNr neurons are slower than the  $\beta$  oscillations often  
447 discussed in the context of parkinsonism. These slow oscillations are consistent with previous  
448 results in anesthetized animals (*Walters et al., 2007*) and arise in recently reported experiments  
449 (*Whalen et al., 2020*) and in the data presented here. Our results, based on the amplitude and  
450 shape of PRCs, predict that oscillation frequency will vary with  $E_{GABA}$  and with the strength of  
451 synapses between SNr neurons (Figure 9) but never reach frequencies in the  $\beta$  band. Various data,  
452 simulations and theory suggest different changes in PRC shape with neuronal firing rate (*Tsubo*  
453 *et al., 2007; Phoka et al., 2010; Couto et al., 2015; Ermentrout and Terman, 2010*). Simulations of  
454 our model SNr neurons showed a reduction in PRC amplitude with increased presynaptic neuron  
455 firing rate, up to saturation around  $25\text{ Hz}$ , which would lead to the need for more oscillation cycles  
456 to occur to achieve one full passage along the PRC (e.g., Fig. 9). This explains why, although more  
457 cycles occur in a given time, the slow oscillation frequency does not significantly increase. The  
458 mechanism underlying the changes in our model neuron's PRC with input frequency likely depends  
459 on the particular currents included but remains for future investigation.

460 The precise functions of Str inputs to SNr neurons remain unknown. Although there is significant  
461 literature supporting a role for these inputs in action selection or initiation, there are certainly other  
462 possibilities. One such idea is that Str inputs encode movement velocity and the resulting SNr firing  
463 rate encodes spatial position (*Kim et al., 2014; Bartholomew et al., 2016; Barter et al., 2015*). If we  
464 apply our modeling results to this view, then we predict that the  $Cl^-$  load from the GPe, by tuning  
465 SNr responses to GABAergic inputs from Str, could impact velocity with which selected movements  
466 are performed. On the other hand, we do not expect that Str inputs would tune  $E_{GABA}$  in SNr and  
467 SNr synchrony, as we predict for GPe inputs. This difference arises due to the lower Str baseline  
468 firing rate, which would have less impact on  $Cl^-$  load, and the dendritic targeting of Str inputs to  
469 SNr, which would not induce a strong effect at the soma.

470 In mice, DA depletion increases SNr synchrony (*Willard et al., 2019*) and promotes slow oscil-  
471 lations (*Whalen et al., 2020*). In our model, this may be explained by a depolarizing shift in  $E_{GABA}$   
472 under these conditions, presumably driven by a reduction in GPe firing rate (*Filion et al., 1991;*  
473 *Boraud et al., 1998; Wichmann et al., 2002*) and/or decreased GABAergic synaptic output to the  
474 SNr. Therefore, we would predict GABAergic inhibition to be stronger in under DA depletion. This

475 is consistent with previous a previous study which shows that GABAergic inhibition in the SNr is  
476 attenuated by activation of D2 receptors (*Martin and Waszczak, 1996*). Additionally, our model  
477 predicts that strengthened GABAergic inhibition could enhance the capability of inputs from the Str  
478 to pause SNr firing, potentially facilitating action selection. Consistent with this idea, DA depletion  
479 has been shown to accelerate saccadic perceptual decisions in humans (*Van Stockum et al., 2011*;  
480 *van Stockum et al., 2013*).

481 While our model allows for the simulation of multiple sources of GABA to SNr neurons along  
482 with somato-dendritic interactions, short-term synaptic plasticity, and time courses of  $[Cl^-]$  and  
483  $E_{GABA}$  dynamics, it does omit a variety of additional factors that could impact our predictions. Most  
484 significantly, to focus on GABAergic effects, we ignored STN inputs to SNr neurons. In baseline  
485 conditions of ongoing high frequency STN activity, these inputs would help tune SNr excitability  
486 but we do not expect them to be relevant for adjusting  $Cl^-$  load and  $E_{GABA}$ ; the effects of more  
487 patterned STN activity under DA depletion remain to be explored. Secondly, our description of  
488 the location of GPe projections on SNr neurons involves some simplification. GPe projections  
489 primarily form synapses around the soma but also form synapses on proximal dendrites (*Smith  
490 and Bolam, 1991; Von Krosigk et al., 1992*), which we have ignored. The study conducted by *Smith  
491 and Bolam (1991)* found that SNr-projecting GPe neurons formed synapses with the soma and  
492 the distal dendrites of 54% and 32% of SNr neurons, respectively. Although our model does not  
493 distinguish among the diverse subpopulations of GPe neurons that have been identified (*Mastro  
494 et al., 2014; Hernández et al., 2015; Abdi et al., 2015*), an intriguing possibility for future study is  
495 that different subsets of GPe neurons may project to different sites on SNr neurons, allowing for  
496 separable control over local SNr interactions and synchrony versus responses to Str inputs. Along  
497 similar lines, we assumed that GABAergic SNr collaterals form somatic as opposed to dendritic  
498 synapses. We also did not model non-neuronal cells such as glia that can affect extracellular ion  
499 concentrations, which could reduce the amplitude of the effects that we describe; the variability in  
500 extracellular concentrations of ions other than  $Cl^-$  such as  $K^+$ , which could affect SNr excitability;  
501 slower components of synaptic depression that, if present, may yield a gradual weakening of  
502 inhibition over several seconds; and direct effects of DA and other neuromodulators.

503 We have cited and shown that our results are consistent with a range of experimental data. To  
504 really pin down the relevance of these ideas, future experiments would need to be performed to  
505 measure intracellular  $[Cl^-]$  or  $E_{GABA}$  itself. For the latter, it may be possible to perform perforated  
506 patch recordings and measure  $E_{GABA}$  as a function of GPe firing rate, but these experiments are  
507 challenging and may not be possible in dendrites. If they are born out by future experiments, the  
508 findings of this study may have implications outside of the SNr, as  $GABA_A$  is a major neurotransmitter  
509 in the CNS.

## 510 Methods and Materials

### 511 Model description

512 Model SNr neurons were developed that each feature both a somatic and a dendritic compartment  
 513 and incorporate Hodgkin-Huxley style conductances adapted from previously described models  
 514 and/or experimental data (Xia et al., 1998; Zhou et al., 2008; Corbit et al., 2016; Doyon et al., 2016a).  
 515 The membrane potentials for the somatic ( $V_S$ ) and dendritic compartments ( $V_D$ ) are given by the  
 516 following differential equations:

$$C_S \frac{dV_S}{dt} = -I_{Na} - I_{NaP} - I_K - I_{Ca} - I_{SK} - I_{Leak} - I_{GABA}^S - I_{DS} + I_{APP} \quad (1)$$

$$C_D \frac{dV_D}{dt} = -I_{TRPC3} - I_{GABA}^D - I_{SD} \quad (2)$$

517 where  $C_S = 100 pF$  and  $C_D = 20 pF$  are the capacitances for the somatic and dendritic compartments.  
 518 The currents in each compartment are represented by  $I_i$  where  $i$  denotes the current type. The  
 519 somatic compartment features the essential spike generating currents as well as several others:  
 520 fast  $Na^+$  current ( $I_{Na}$ ), persistent  $Na^+$  current ( $I_{NaP}$ ), delayed rectifying  $K^+$  current ( $I_K$ ),  $Ca^{2+}$  current  
 521 ( $I_{Ca}$ ),  $Ca^{2+}$ -activated  $K^+$  current ( $I_{SK}$ ), and leak current ( $I_{Leak}$ ) as well as a synaptic current which  
 522 represents the GABAergic input from the GPe neurons of the indirect pathway ( $I_{GABA}^S$ ).  $I_{APP}$  denotes  
 523 an applied current injected from an electrode. The dendritic compartment contains a current  
 524 from a transient receptor potential channel 3 (TRPC3) ( $I_{TRPC3}$ ) and a synaptic current ( $I_{GABA}^D$ ), which  
 525 represents the GABAergic input from the striatal neurons of the direct pathway. The two additional  
 526 currents  $I_{DS}$  and  $I_{SD}$  are coupling terms that represent the current from the dendrite into the soma  
 527 and from the soma into the dendrite, respectively. The currents are defined as follows:

$$I_{Na} = g_{Na} \cdot m_{Na}^3 \cdot h_{Na} \cdot s_{Na} \cdot (V_S - E_{Na}) \quad (3)$$

$$I_{NaP} = g_{NaP} \cdot m_{NaP}^3 \cdot h_{NaP} \cdot (V_S - E_{Na}) \quad (4)$$

$$I_K = g_K \cdot m_K^4 \cdot h_K \cdot (V_S - E_K) \quad (5)$$

$$I_{Ca} = g_{Ca} \cdot m_{Ca} \cdot h_{Ca} \cdot (V_S - E_{Ca}) \quad (6)$$

$$I_{SK} = g_{SK} \cdot m_{SK} \cdot (V_S - E_K) \quad (7)$$

$$I_{Leak} = g_{Leak} \cdot (V_S - E_{Leak}) \quad (8)$$

$$I_{GABA}^S = g_{GABA}^S \cdot (V_S - E_{GABA}^S) \quad (9)$$

$$I_{DS} = \frac{g_C}{\alpha_C} \cdot (V_S - V_D) \quad (10)$$

$$I_{TRPC3} = g_{TRPC3} \cdot (V_D - E_{TRPC3}) \quad (11)$$

$$I_{GABA}^D = g_{GABA}^D \cdot (V_D - E_{GABA}^D) \quad (12)$$

$$I_{SD} = \frac{g_C}{1 - \alpha_C} \cdot (V_D - V_S), \quad (13)$$

528

529 where  $g_i$  is the maximum conductance,  $E_i$  is the reversal potential, and  $m_i$  and  $h_i$  are gating variables

530 for channel activation and inactivation for each current  $I_i$ .  $s_{Na}$  is an additional inactivation term  
 531 governing spike-frequency adaptation. The parameter  $\alpha_C = 0.833$  is the ratio of somatic and total  
 532 capacitances. The GABAergic synaptic conductances  $g_{GABA}^S, g_{GABA}^D$  are variable and will be defined  
 533 below. The values used for the  $g_i$  and  $E_i$  are given in Table 1.

**Table 1.** Ionic Channel Parameters.

| Channel          | Parameters                           |                                              |                                   |
|------------------|--------------------------------------|----------------------------------------------|-----------------------------------|
| $I_{Na}$         | $g_{Na} = 35 \text{ nS/pF}$          | $E_{Na} = 50.0 \text{ mV}$                   |                                   |
|                  | $m_{1/2} = -30.2 \text{ mV}$         | $k_m = 6.2 \text{ mV}$                       |                                   |
|                  | $\tau_m^0 = 0.05 \text{ ms}$         | $\tau_m^1 = 0.05 \text{ ms}$                 | $\tau_{1/2}^m = 1 \text{ mV}$     |
|                  | $\sigma_m^0 = 1 \text{ mV}$          | $\sigma_m^1 = 1 \text{ mV}$                  |                                   |
|                  | $h_{1/2} = -63.3 \text{ mV}$         | $k_h = -8.1 \text{ mV}$                      |                                   |
|                  | $\tau_h^0 = 0.59 \text{ ms}$         | $\tau_h^1 = 35.1 \text{ ms}$                 | $\tau_{1/2}^h = -43.0 \text{ mV}$ |
|                  | $\sigma_h^0 = 10 \text{ mV}$         | $\sigma_h^1 = -5 \text{ mV}$                 |                                   |
|                  | $s_{1/2} = -30.0 \text{ mV}$         | $k_s = -0.4 \text{ mV}$                      |                                   |
|                  | $\tau_s^0 = 10 \text{ ms}$           | $\tau_s^1 = 50 \text{ ms}$                   | $\tau_{1/2}^s = -40 \text{ mV}$   |
|                  | $\sigma_s^0 = 18.3 \text{ mV}$       | $\sigma_s^1 = -10 \text{ mV}$                | $s_{min} = 0.15$                  |
| $I_{NaP}$        | $g_{NaP} = 0.175 \text{ nS/pF}$      |                                              |                                   |
|                  | $m_{1/2} = -50.0 \text{ mV}$         | $k_m = 3.0 \text{ mV}$                       |                                   |
|                  | $\tau_m^0 = 0.03 \text{ ms}$         | $\tau_m^1 = 0.146 \text{ ms}$                | $\tau_{1/2}^m = -42.6 \text{ mV}$ |
|                  | $\sigma_m^0 = 14.4 \text{ mV}$       | $\sigma_m^1 = -14.4 \text{ mV}$              | $m_{min} = 0.0$                   |
|                  | $h_{1/2} = -57.0 \text{ mV}$         | $h_m = -4.0 \text{ mV}$                      |                                   |
|                  | $\tau_h^0 = 10.0 \text{ ms}$         | $\tau_h^1 = 17.0 \text{ ms}$                 | $\tau_{1/2}^h = -34.0 \text{ mV}$ |
|                  | $\sigma_h^0 = 26.0 \text{ mV}$       | $\sigma_h^1 = -31.9 \text{ mV}$              | $h_{min} = 0.154$                 |
| $I_K$            | $g_K = 50 \text{ nS/pF}$             | $E_K = -90.0 \text{ mV}$                     |                                   |
|                  | $m_{1/2} = -26 \text{ mV}$           | $k_m = 7.8 \text{ mV}$                       |                                   |
|                  | $\tau_m^0 = 0.1 \text{ ms}$          | $\tau_m^1 = 14.0 \text{ ms}$                 | $\tau_{1/2}^m = -26.0 \text{ mV}$ |
|                  | $\sigma_m^0 = 13.0 \text{ mV}$       | $\sigma_m^1 = -12.0 \text{ mV}$              |                                   |
|                  | $h_{1/2} = -20.0 \text{ mV}$         | $h_m = -10.0 \text{ mV}$                     |                                   |
|                  | $\tau_h^0 = 5.0 \text{ ms}$          | $\tau_h^1 = 20.0 \text{ ms}$                 | $\tau_{1/2}^h = 0.0 \text{ mV}$   |
| $I_{Ca}$         | $g_{Ca} = 0.7 \text{ nS/pF}$         | $E_{Ca} = 13.27 \cdot \ln(Ca_{out}/Ca_{in})$ |                                   |
|                  | $Ca_{out} = 4.0 \text{ mM}$          | $Ca_{in}$ , see Eq. 18                       |                                   |
|                  | $m_{1/2} = -27.5 \text{ mV}$         | $k_m = 3.0 \text{ mV}$                       | $\tau_m = 0.5 \text{ ms}$         |
|                  | $h_{1/2} = -52.5 \text{ mV}$         | $k_h = -5.2 \text{ mV}$                      | $\tau_h = 18.0 \text{ ms}$        |
| $I_{SK}$         | $k_{SK} = 0.4 \text{ mM}$            | $n_{SK} = 4$                                 | $\tau_{sk} = 0.1 \text{ ms}$      |
| $I_{Leak}$       | $g_{Leak} = 0.04 \text{ nS/pF}$      | $E_{Leak} = -60 \text{ mV}$                  |                                   |
| $I_{GABA}^S$     | $W_{GABA}^{GPe} = 0.2 \text{ nS/pF}$ | $E_{GABA}^S$ , see Eq. 23                    | $\tau_{SynE} = 3.0 \text{ ms}$    |
|                  | $D_0 = 1.0$                          | $\alpha_D = 0.565$                           | $\tau_D = 1000 \text{ ms}$        |
|                  | $D_{min} = 0.67$                     | $W_{GABA}^{SNr} = 0.1 \text{ nS/pF}$         |                                   |
| $I_{SD}, I_{DS}$ | $g_C = 0.65 \text{ nS/pF}$           |                                              |                                   |
| $I_{TRPC3}$      | $g_{TRPC3} = 0.1 \text{ nS/pF}$      | $E_{TRPC3} = -37.0 \text{ mV}$               |                                   |
| $I_{GABA}^D$     | $W_{GABA}^{Snr} = 0.4 \text{ nS/pF}$ | $E_{GABA}^D$ , see Eq. 23                    | $\tau_{GABA}^D = 7.2 \text{ ms}$  |
|                  | $F_0 = 0.145$                        | $\alpha_F = 0.125$                           | $\tau_F = 1000 \text{ ms}$        |

534 Activation ( $m_i$ ) and inactivation ( $h_i, s_i$ ) of voltage-dependent channels are described as follows:

$$\frac{dz_i}{dt} = \frac{z_i^\infty - z_i}{\tau_{z_i}}, \quad i = \{Na, NaP, K, Ca\}, \quad z = \{m, h, s\}. \quad (14)$$

535 Steady-state (in)activation functions and their time constants ( $\tau_{z_i}$ ) are described by:

$$z_i^\infty(V) = \frac{1}{1 + e^{-(V - z_{i/2}^1)/k_{z_i}}}, \quad (15)$$

536

$$\tau_{z_i}(V) = \tau_{z_i}^0 + \frac{\tau_{z_i}^1 - \tau_{z_i}^0}{e^{(\tau_{i/2}^1 - V)/\sigma_{z_i}^0} + e^{(\tau_{i/2}^1 - V)/\sigma_{z_i}^1}}. \quad (16)$$

537 The parameters for these currents are given in Table 1 and were adapted from **Corbit et al. (2016)**.

538 Activation of the small conductance calcium-activated potassium channels (SK) is instantaneous  
539 and depends on the intracellular calcium concentration ( $[Ca]_i$ ):

$$m_{SK}([Ca]_{in}) = \left(1 + \left(\frac{k_{SK}}{[Ca]_{in}}\right)^{n_{SK}}\right)^{-1}, \quad (17)$$

540 where  $k_{SK}$  represents the half-activation  $Ca^{2+}$  concentration and  $n_{SK}$  is the Hill coefficient. The  
541 parameters are given in Table 1 and were taken from **Xia et al. (1998)**.

542 The intracellular calcium concentration is determined by the balance of  $Ca^{2+}$  influx carried by  
543  $I_{Ca}$  and efflux via the  $Ca^{2+}$  pump. In the model,  $I_{Ca}$  and  $I_{SK}$  are only expressed in the soma and  
544 therefore  $[Ca]_{in}$  dynamics is only simulated in the somatic compartment. Dynamics of  $[Ca]_{in}$  are  
545 described by the following equation:

$$\frac{d[Ca]_{in}}{dt} = -\alpha_{ca} \cdot I_{Ca} - ([Ca]_{in} - Ca_{min})/\tau_{Ca}, \quad (18)$$

546 where  $\alpha_{ca} = 1.0 \cdot 10^{-8} mM/fC$  is a conversion factor relating current and rate of change in  $[Ca]_{in}$ ,  
547  $\tau_{Ca} = 250 ms$  is the time constant for the  $Ca^{2+}$  extrusion and  $Ca_{min} = 5.0 \cdot 10^{-8} mM$  is the minimum  
548 calcium concentration.

#### 549 Synaptic dynamics

550 The GABAergic synaptic conductance in the somatic ( $g_{GABA}^S$ ) and dendritic  $g_{GABA}^D$  compartments are  
551 described by the following equations:

$$\frac{dg_{GABA}^S}{dt} = -\frac{g_{GABA}^S}{\tau_{GABA}^S} + W_{GABA}^{GPe} \cdot D \cdot \delta(t - t_n) + W_{GABA}^{SNr} \cdot \delta(t - t_m), \quad (19)$$

552 and

$$\frac{dg_{GABA}^D}{dt} = \frac{g_{GABA}^D}{\tau_{GABA}^D} + W_{GABA}^{Str} \cdot F \cdot \delta(t - t_l), \quad (20)$$

553 where  $\tau_{GABA}^{\{S,D\}}$  is the exponential decay time constant for the somatic and dendritic compartments,  
554  $W_{GABA}^{\{GPe,SNr,Str\}}$  is the synaptic weight of inputs from the GPe, SNr, and Str.  $\delta(\cdot)$  represents the  
555 Kronecker delta function,  $t$  is time, and  $t_{\{n,m,l\}}$  represent the times that inputs  $n, m, l$  are received from  
556 GPe, SNr, and Str, respectively. The functions  $D$  and  $F$  are scaling factors representing short-term  
557 synaptic depression and facilitation, which were simulated using an established mean-field model of  
558 short-term synaptic depression/facilitation (**Abbott et al., 1997; Dayan and Abbott, 2001; Morrison**  
559 **et al., 2008**) as follows:

$$\frac{dD}{dt} = \frac{D_0 - D}{\tau_D} - \alpha_D(D - D_{min}) \cdot \delta(t - t_l), \quad (21)$$

560 and

$$\frac{dF}{dt} = \frac{F_0 - F}{\tau_F} + \alpha_F(1 - F) \cdot \delta(t - t_k). \quad (22)$$

561 The parameters for  $D_0$ ,  $\tau_D$ ,  $\alpha_D$ ,  $D_{min}$ ,  $F_0$ ,  $\tau_F$ , and  $\alpha_F$  are listed in Table 1 and were chosen to empirically  
562 match experimental data from **Connelly et al. (2010)**, see Fig. 2.

## 563 Chloride and $E_{GABA}$ Dynamics

564 GABA<sub>A</sub> receptors are permeable to both  $Cl^-$  and  $HCO_3^-$  ions. Therefore, the reversal potential  
565  $E_{GABA}$  is a function of ion concentration gradients for both of these substances and is determined  
566 by the Goldman-Hodgkin-Katz voltage equation:

$$E_{GABA} = \frac{RT}{F} \cdot \ln\left(\frac{4[Cl^-]_{in} + [HCO_3^-]_{in}}{4[Cl^-]_{out} + [HCO_3^-]_{out}}\right), \quad (23)$$

567 where  $R = 8.314 \text{ J}/(\text{molK})$  is the universal gas constant;  $T = 308 \text{ K}$  is temperature;  $F = 96.485 \text{ kC}/\text{mol}$   
568 is the Faraday constant. The concentrations  $[Cl^-]_{out} = 120 \text{ mM}$ ,  $[HCO_3^-]_{in} = 11.8 \text{ mM}$ ,  $[HCO_3^-]_{out} =$   
569  $25.0 \text{ mM}$  are fixed parameters representing the extracellular  $Cl^-$  and intracellular and extracellular  
570  $HCO_3^-$  concentrations, respectively. Parameters were adapted from **Doyon et al. (2016a)**. The  
571 intracellular  $Cl^-$  concentration in the somatic ( $[Cl^-]_{in}^S$ ) and dendritic ( $[Cl^-]_{in}^D$ ) compartments is  
572 dynamic and is determined by the balance of  $Cl^-$  influx through GABAergic synapses ( $I_{GABA}$ ) and  
573 efflux via the KCC2  $Cl^-$  extruder. In both compartments, the dynamics of  $[Cl^-]_{in}$  is governed by the  
574 following equation:

$$\frac{d[Cl^-]_{in}}{dt} = \alpha_{Cl} \cdot [g_{KCC2} \cdot (E_{Cl} - E_k) - \chi \cdot (g_{GABA} + g_{GABA}^{Tonic}) \cdot (V - E_{Cl})], \quad (24)$$

$$\chi = \frac{V - E_{CL}}{V - E_{GABA}}, \quad \text{and} \quad E_{Cl} = \frac{RT}{F} \cdot \ln\left(\frac{Cl_{out}}{Cl_{in}}\right). \quad (25)$$

575 In the previous equations,  $\alpha_{Cl}$  is a conversion factor relating current and rate of change in  $[Cl^-]_{in}$ ,  
576  $g_{KCC2}$ ,  $g_{GABA}$  and  $g_{GABA}^{Tonic}$  are the conductances of the KCC2  $Cl^-$  extruder, GABAergic conductance,  
577 and tonic chloride load.  $\chi$  describes the fraction of the GABA<sub>A</sub> current that is carried by  $Cl^-$  ions,  
578 and  $V$  represents the membrane potential of the specific compartment. The dynamics of  $Cl^-$  are  
579 simulated separately for the somatic ( $[Cl^-]_{in}^S$ ) and dendritic ( $[Cl^-]_{in}^D$ ) compartments, which have distinct  
580  $\alpha_{Cl}$  values, specifically  $1.77 \cdot 10^{-7} \text{ mM}/fC$  and  $2.2125 \cdot 10^{-7} \text{ mM}/fC$  for the somatic and dendritic  
581 compartments. In both compartments  $g_{KCC2}$  and  $g_{GABA}^{Tonic}$  are parameters which are varied to tune  
582  $E_{GABA}$ . Specifically,  $g_{KCC2}$  is varied from 0.0 to  $0.4 \text{ nS}/pF$  and  $g_{GABA}^{Tonic}$  is from 0.0 to  $1.0 \text{ nS}/pF$ .  $E_k$  is  
583 fixed and can be found in Table 1. This mathematical description of  $Cl^-$  dynamics was adapted  
584 from **Doyon et al. (2016a)**.

## 585 Phase Response Curves

586 The dataset for calculating the phase response curves were generated by simulating transient  
587 GABAergic inputs to the somatic compartment every 2 s plus a randomly generated variation of 0  
588 to 100 ms. The dataset was post-processed in Matlab and for each simulated GABAergic input, the  
589 change in phase relative to the input phase was extracted. Equations for the PRCs were generated  
590 using a fourth order polynomial fit.

591 Bidirectional network: Phase on the horizontal axis is defined in a frame relative to the phase of  
592 neuron 1. In other words, to compute the PRC of neuron 2, we consider the effect of an input from  
593 neuron 1 to neuron 2 when neuron 2 is at different phases; the fact that neuron 1 is supplying the  
594 input means that the phase of neuron 1 is 1. To compute the PRC of neuron 1, we should still think  
595 of the phase of neuron 1 as being 1 (or equivalently 0), but now neuron 2 is the neuron providing  
596 the input. As a result, the PRC for neuron 1 ends up being given by reflecting the PRC for neuron 2  
597 about 0.5.

598 For example, suppose that the phase of neuron 2 is altered by an amount  $\Delta\phi$  if it receives an  
599 input when it is at phase 0.8, such that the PRC of neuron 2 takes the value  $\Delta\phi$  at phase  $\phi = 0.8$ .  
600 Note that at  $\phi = 0.8$ , neuron 2 lags neuron 1 by a phase of 0.2. Now, at what phase should the PRC  
601 for neuron 1 take the value  $\Delta\phi$ ? To answer this question, we must determine the phase of neuron 2  
602 when it spikes, given that neuron 1 lags neuron 2 by 0.2. But since the phase of neuron 1 is 0, we  
603 simply conclude that the value  $\Delta\phi$  occurs on the PRC of neuron 1 at  $\phi = 0.2$  (i.e., at  $\phi = 1 - 0.8$ ).

## 604 SNr network construction

605 As mentioned above, the SNr is a sparsely connected network where each neuron is estimated to  
606 receive between 1-4 inputs from neighboring SNr neurons (Higgs and Wilson, 2016). To represent  
607 sparse connectivity in our simulated 100 neuron SNr network (see Fig. 11 A), equation (19) for  
608  $g_{GABA}^S$  was slightly modified such that the somatic GABAergic conductance in the  $i^{th}$  neuron in the  
609 population is described by the following equation:

$$g_{GABA}^S = \sum_{j \neq i; n} W_{j,i}^{SNr} \cdot C_{ji} \cdot H(t - t_{j,n}) \cdot e^{-(t-t_{j,n})/\tau_{GABA}^S}, \quad (26)$$

610 where  $W_{j,i}^{SNr}$  is the weights of the SNr to SNr synaptic connection from source neuron  $j$  to the target  
611 neuron  $i$ .  $C_{ji}$  is a connectivity matrix where  $C_{ji} = 1$  if neuron  $j$  makes a synapse on neuron  $i$ , and  
612  $C_{ji} = 0$  otherwise.  $H(\cdot)$  is the Heaviside step function, and  $t$  denotes time.  $t_{j,n}$  is the time at which the  
613  $n^{th}$  action potential is generated in neuron  $j$  and reaches neuron  $i$ . Sparse connectivity in the model  
614 was achieved by randomly assigning the values of  $C_{ji}$  such that the probability of any connection  
615 between neuron  $i$  and  $j$  being 1 is equal to the 0.02. Heterogeneity in the network was introduced  
616 by uniformly distributing the weights of SNr connections such that  $W_{j,i}^{SNr} = U(0, 0.1 nS/pF)$ . Addi-  
617 tionally, in order to match *in vivo* data (Freeze et al., 2013; Mastro et al., 2017; Willard et al., 2019)  
618 the baseline firing rate was increased to  $\approx 25 Hz$  by setting  $g_{Glut}^D = U(0.020, 0.12) nS$ . Additionally,  
619 diffusion of  $Cl^-$  between the somatic and dendritic compartments is incorporated into the network  
620 model. This was simulated by the addition of the exponential decay terms  $-([Cl]_{in}^S - [Cl]_{in}^D)/(\tau_{SD})$   
621 and  $-([Cl]_{in}^S - [Cl]_{in}^S)/(\tau_{DS})$  into Eq. (24) for the somatic and dendritic compartments respectively.  
622 The parameters  $\tau_{SD} = 200 ms$  and  $\tau_{DS} = 80 ms$  are exponential decay time constants.

## 623 Data analysis and definitions

624 Data generated from simulations was post-processed in Matlab (Mathworks, Inc.). An action poten-  
625 tial was defined to have occurred in a neuron when its membrane potential  $V_m$  increased through  
626  $-35mV$ . For characterization of the paired pulse ratios of simulated GPe and Str inputs (Fig. 2 & 3),  
627 the IPSC/IPSP amplitude is defined as the absolute value of the difference between current/potential  
628 immediately before the start of the synaptic input and the local maximum occurring in a 10ms  
629 window following the synaptic input. Histograms of population activity were calculated as the  
630 number of action potentials per 20ms bin per neuron with units of  $APs/(s \cdot neuron)$ .

631 The response of SNr neurons to optogenetic stimulation of GPe and Str terminals were catego-  
632 rized by breaking up the full 10s stimulation period into bins. The first 1s was broken up into 1/3s  
633 bins. The rest of the period was broken into 1s bins. The spiking in each bin was then compared to  
634 baseline using t-tests where a p-value less than 0.05 was considered statistically significant. Each  
635 response category was defined as follows: (1) Complete Inhibition: less than two spikes in the full  
636 10s period, (2) Partial Inhibition: at least one bin is statistically less than baseline and no bins are  
637 excited, (3) No Effect: no bins are statistically different than baseline, (4) Excitation: at least one  
638 bin is statistically above baseline and no bins are less than baseline, (5) Biphasic: at least one bin  
639 is statistically below and one above baseline. In order to identify pauses that are longer than can  
640 be accounted for by short-term synaptic dynamics, the "long pause" was defined as any pause  
641 in spiking that continues after 10 stimulus pulses (steady state is reached after roughly 5 pulses),  
642 which equates to 1000ms, 500ms, 250ms and 125ms for stimulation at 10Hz, 20Hz, 40Hz and 60Hz,  
643 respectively.

## 644 Integration methods

645 All simulations were performed locally on an 8-core Linux-based operating system. Simulation  
646 software was custom written in C++. Numerical integration was performed using the first-order  
647 Euler method with a fixed step-size ( $\Delta t$ ) of 0.025ms.

## 648 **Slice electrophysiology**

649 Coronal slices containing SNr (300  $\mu\text{m}$ ) were prepared using a VT1000S vibratome (Leica Microsystems)  
650 from brains of 6-9-week-old (both male and female) mice that had received Chr2 viral  
651 injections 2-4 weeks prior. Slices were cut in carbogenated HEPES ACSF containing the following (in  
652 mM): 20 HEPES, 92 NaCl, 1.2  $\text{NaHCO}_3$ , 2.5 KCl, 1  $\text{MgSO}_4$ , 2  $\text{CaCl}_2$ , 30  $\text{NaH}_2\text{PO}_4$ , 25 glucose, pH 7.25.  
653 Slices were allowed to recover for 15 min at 33°C in a chamber filled with N-methyl-D-glucamine-  
654 HEPES recovery solution (in mM): 93 N-methyl-D-glucamine, 2.5 KCl, 1.2  $\text{NaH}_2\text{PO}_4$ , 30  $\text{NaHCO}_3$ , 20  
655 HEPES, 25 glucose, 10  $\text{MgSO}_4$ , 0.5  $\text{CaCl}_2$ . Slices were then held at room temperature for at least 1 h  
656 before recording carbogenated HEPES ACSF. Recordings were conducted at 33°C in carbogenated  
657 ACSF (in mM) as follows: 125 NaCl, 26  $\text{NaHCO}_3$ , 1.25  $\text{NaH}_2\text{PO}_4$ , 2.5 KCl, 12.5 glucose, 1  $\text{MgSO}_4$ , and  
658 2  $\text{CaCl}_2$ . Data were collected with a MultiClamp 700B amplifier (Molecular Devices) and ITC-18  
659 analog-to-digital board (HEKA) using Igor Pro software (Wavemetrics, RRID:SCR\_000325) and custom  
660 acquisition routines (Recording Artist; Richard C. Gerkin, Phoenix). Data were collected at 10 kHz  
661 and digitized at 40 kHz. Electrodes were made from borosilicate glass (pipette resistance, 2–6 M).  
662 The pipet solution consisted of (in mM): 130  $\text{KMeSO}_3$ , 10 NaCl, 2  $\text{MgCl}_2$ , 0.16  $\text{CaCl}_2$ , 0.5 EGTA, 10  
663 HEPES, 2 Mg-ATP, and 0.3 NaGTP.

## 664 **Surgery and viral injections**

665 Stereotaxic surgeries for viral transfection of Chr2 (AAV2-hsyn-Chr2-eYFP or AAV2-hsyn-Chr2-  
666 mCherry, University of North Carolina Vector Core Facility, virus titer  $3.1 \times 10^{12}$ ) were performed  
667 under isoflurane anesthesia (2%). Burr holes were drilled over the target location (GPe or striatum),  
668 and virus was injected using either a Nanoject (Drummond Scientific) and glass pulled pipette or a  
669 syringe pump (Harvard Scientific) fitted with a syringe (Hamilton) connected to PE10 tubing and  
670 a 30 gauge cannula. Viral injections were performed at p35-p50 and allowed to incubate for 2-4  
671 weeks for optogenetic slice electrophysiology.

## 672 **Oscillation detection**

673 Oscillating units were detected by a two-step process as described in *Whalen et al. (2020)*.  
674 First, we identified peaks in the 0.5 – 4  $\text{Hz}$  range of the power spectrum (computed with Welch's  
675 method and corrected for the unit's ISI distribution) and determined if any fell above a confidence  
676 interval estimated from high frequency (100 – 500  $\text{Hz}$ ) power, correcting for multiple comparisons  
677 (Bonferroni correction). Then, to distinguish oscillations from 1/f noise, we determined if the  
678 mean phase shift at this identified frequency fell below a confidence interval estimated from high  
679 frequency phase shift. A unit which passed both these criteria was considered to be oscillating.

## 680 **Acknowledgments**

681 This study was partially supported by NIH awards R01NS101016, R01NS104835, and R21NS095103  
682 (AG) and NSF awards DMS 1516288 (AG, JR), 1612913 (JR), and 1724240 (JR). Some of the data  
683 incorporated into Figure 10 was recorded in the Gittis lab by Kevin Mastro. We thank Tim Whalen  
684 for help processing the data for Figure 10, for discussions, and for comments on the manuscript.

## 685 **Supplementary Material**



**Figure S1.** Summary of SNr responses to optogenetic stimulation of GPe synaptic terminals. (A1-A4) Raster plots of spiking sorted by the duration of the pause in spiking at the start of the stimulation period for all SNr neurons tested. (B1-B4) Effect of GPe stimulation on the firing rate of SNr neurons averaged across all neurons and each stimulation frequencies tested. Error bars indicate SD. (C1 & C2) Quantification of types of SNr responses to optogenetic stimulation for varying frequency characterized in the first (C1) 1 s or the full (C2) 10 s. Notice that fewer neurons are completely inhibited in the full 10 s period and some biphasic responses emerge.

## References

- 686  
687 **Abbott LF**, Varela J, Sen K, Nelson S. Synaptic depression and cortical gain control. *Science*. 1997; 275(5297):221–  
688 224.
- 689 **Abdi A**, Mallet N, Mohamed FY, Sharott A, Dodson PD, Nakamura KC, Suri S, Avery SV, Larvin JT, Garas FN, et al.  
690 Prototypic and arky pallidal neurons in the dopamine-intact external globus pallidus. *Journal of Neuroscience*.  
691 2015; 35(17):6667–6688.
- 692 **Astorga G**, Bao J, Marty A, Augustine GJ, Franconville R, Jalil A, Bradley J, Llano I. An excitatory GABA loop  
693 operating in vivo. *Frontiers in cellular neuroscience*. 2015; 9:275.
- 694 **Atherton JF**, Bevan MD. Ionic mechanisms underlying autonomous action potential generation in the somata  
695 and dendrites of GABAergic substantia nigra pars reticulata neurons in vitro. *Journal of Neuroscience*. 2005;  
696 25(36):8272–8281.
- 697 **Barter JW**, Li S, Sukharnikova T, Rossi MA, Bartholomew RA, Yin HH. Basal ganglia outputs map instantaneous  
698 position coordinates during behavior. *Journal of Neuroscience*. 2015; 35(6):2703–2716.
- 699 **Bartholomew RA**, Li H, Gaidis EJ, Stackmann M, Shoemaker CT, Rossi MA, Yin HH. Striatonigral control of  
700 movement velocity in mice. *European Journal of Neuroscience*. 2016; 43(8):1097–1110.
- 701 **Basso MA**, Pokorny JJ, Liu P. Activity of substantia nigra pars reticulata neurons during smooth pursuit eye  
702 movements in monkeys. *European Journal of Neuroscience*. 2005; 22(2):448–464.
- 703 **Basso MA**, Wurtz RH. Neuronal activity in substantia nigra pars reticulata during target selection. *Journal of*  
704 *Neuroscience*. 2002; 22(5):1883–1894.
- 705 **Boraud T**, Bezard E, Guehl D, Bioulac B, Gross C. Effects of L-DOPA on neuronal activity of the globus pallidus  
706 externalis (GPe) and globus pallidus internalis (GPI) in the MPTP-treated monkey. *Brain research*. 1998;  
707 787(1):157–160.



**Figure S2.** Summary of SNr responses to optogenetic stimulation of Str synaptic terminals. (A1-A4) Raster plots of spiking sorted by the duration of the pause in spiking at the start of the stimulation period for all SNr neurons tested. (B1-B4) Effect of Str stimulation on the firing rate of SNr neurons averaged across all neurons and each stimulation frequencies tested. Error bars indicate SD. (C1 & C2) Quantification of types of SNr responses to optogenetic stimulation for varying frequency characterized in the first (C1) 1 s or the full (C2) 10 s. Notice the decrease in the number of completely inhibited neurons and increase in the number of biphasic responses in the full 10 s period.

- 708 **Brown J**, Pan WX, Dudman JT. The inhibitory microcircuit of the substantia nigra provides feedback gain control  
709 of the basal ganglia output. *Elife*. 2014; 3:e02397.
- 710 **Chan CS**, Surmeier DJ, Yung WH. Striatal information signaling and integration in globus pallidus: timing matters.  
711 *Neurosignals*. 2005; 14(6):281–289.
- 712 **Connelly WM**, Schulz JM, Lees G, Reynolds JN. Differential short-term plasticity at convergent inhibitory synapses  
713 to the substantia nigra pars reticulata. *Journal of Neuroscience*. 2010; 30(44):14854–14861.
- 714 **Corbit VL**, Whalen TC, Zitelli KT, Crilly SY, Rubin JE, Gittis AH. Pallidostriatal projections promote  $\beta$  oscillations in  
715 a dopamine-depleted biophysical network model. *Journal of Neuroscience*. 2016; 36(20):5556–5571.
- 716 **Couto J**, Linaro D, De Schutter E, Giugliano M. On the firing rate dependency of the phase response curve of rat  
717 purkinje neurons in vitro. *PLoS computational biology*. 2015; 11(3):e1004112.
- 718 **Dayan P**, Abbott LF. Theoretical neuroscience: computational and mathematical modeling of neural systems. .  
719 2001; .
- 720 **Deister CA**, Dodla R, Barraza D, Kita H, Wilson CJ. Firing rate and pattern heterogeneity in the globus pallidus  
721 arise from a single neuronal population. *Journal of neurophysiology*. 2012; 109(2):497–506.
- 722 **Deransart C**, Hellwig B, Heupel-Reuter M, Léger JF, Heck D, Lücking CH. Single-unit analysis of substantia nigra  
723 pars reticulata neurons in freely behaving rats with genetic absence epilepsy. *Epilepsia*. 2003; 44(12):1513–  
724 1520.
- 725 **Ding L**, Gold JI. Caudate encodes multiple computations for perceptual decisions. *Journal of Neuroscience*.  
726 2010; 30(47):15747–15759.
- 727 **Doyon N**, Prescott SA, Castonguay A, Godin AG, Kröger H, De Koninck Y. Efficacy of synaptic inhibition depends  
728 on multiple, dynamically interacting mechanisms implicated in chloride homeostasis. *PLoS computational  
729 biology*. 2011; 7(9):e1002149.



**Figure S3.** Biphasic SNr response to longer simulated GPe stimulation. (A) Dependence of somatic  $E_{GABA}$  on the tonic chloride conductance ( $g_{GABA}^{Tonic}$ ) and the potassium-chloride co-transporter KCC2 extrusion capacity ( $g_{KCC2}$ ) as previously shown in Fig. 4 A. (B) Example of “Partial Inhibition” in response to 1 s of stimulation resulting due to a small accumulation of intracellular  $Cl^-$ , as shown in Fig. 4 E2. (C) Example of longer 10 s stimulation resulting in larger  $Cl^-$  accumulation resulting in a transition of  $E_{GABA}$  from inhibitory to excitatory and thus causing a biphasic response in a simulated SNr neuron’s firing rate, as seen in 10 s stimulation experiments.  $g_{GABA}^{Tonic}$  and  $g_{KCC2}$  are the same in (B) and (C) and take the values indicated in (A). To generate the biphasic example the synaptic conductance  $g_{GABA}^S$  was increased from 0.2 to 0.4 nS/pF.

730 **Doyon N**, Prescott SA, De Koninck Y. Mild KCC2 hypofunction causes inconspicuous chloride dysregulation that  
731 degrades neural coding. *Frontiers in cellular neuroscience*. 2016; 9:516.

732 **Doyon N**, Vinay L, Prescott SA, De Koninck Y. Chloride regulation: a dynamic equilibrium crucial for synaptic  
733 inhibition. *Neuron*. 2016; 89(6):1157–1172.

734 **Dunovan K**, Vich C, Clapp M, Verstynen T, Rubin J. Reward-driven changes in striatal pathway competition shape  
735 evidence evaluation in decision-making. *PLoS computational biology*. 2019; 15(5):e1006998.

- 736 **Ermentrout B.** Type I membranes, phase resetting curves, and synchrony. *Neural computation*. 1996; 8(5):979–  
737 1001.
- 738 **Ermentrout GB, Terman DH.** *Mathematical foundations of neuroscience*, vol. 35. Springer Science & Business  
739 Media; 2010.
- 740 **Filion M, et al.** Abnormal spontaneous activity of globus pallidus neurons in monkeys with MPTP-induced  
741 parkinsonism. *Brain research*. 1991; 547(1):140–144.
- 742 **Freeze BS, Kravitz AV, Hammack N, Berke JD, Kreitzer AC.** Control of basal ganglia output by direct and indirect  
743 pathway projection neurons. *Journal of Neuroscience*. 2013; 33(47):18531–18539.
- 744 **Giorgi FS, Velíšková J, Chudomel O, Kyrozis A, Moshé SL.** The role of substantia nigra pars reticulata in modulating  
745 clonic seizures is determined by testosterone levels during the immediate postnatal period. *Neurobiology of*  
746 *Disease*. 2007; 25(1):73–79.
- 747 **Haam J, Popescu IR, Morton LA, Halmos KC, Teruyama R, Ueta Y, Tasker JG.** GABA is excitatory in adult  
748 vasopressinergic neuroendocrine cells. *Journal of Neuroscience*. 2012; 32(2):572–582.
- 749 **Hernández VM, Hegeman DJ, Cui Q, Kelder DA, Fiske MP, Glajch KE, Pitt JE, Huang TY, Justice NJ, Chan CS.**  
750 Parvalbumin+ neurons and Npas1+ neurons are distinct neuron classes in the mouse external globus pallidus.  
751 *Journal of Neuroscience*. 2015; 35(34):11830–11847.
- 752 **Higgs MH, Wilson CJ.** Unitary synaptic connections among substantia nigra pars reticulata neurons. *Journal of*  
753 *neurophysiology*. 2016; 115(6):2814–2829.
- 754 **Jeong HY, Gutkin B.** Synchrony of neuronal oscillations controlled by GABAergic reversal potentials. *Neural*  
755 *Computation*. 2007; 19(3):706–729.
- 756 **Kaila K, Pasternack M, Saarikoski J, Voipio J.** Influence of GABA-gated bicarbonate conductance on potential,  
757 current and intracellular chloride in crayfish muscle fibres. *The Journal of Physiology*. 1989; 416(1):161–181.
- 758 **Kaila K, Voipio J.** Postsynaptic fall in intracellular pH induced by GABA-activated bicarbonate conductance.  
759 *Nature*. 1987; 330(6144):163.
- 760 **Kaila K, Ruusuvaara E, Seja P, Voipio J, Puskarijov M.** GABA actions and ionic plasticity in epilepsy. *Current opinion*  
761 *in neurobiology*. 2014; 26:34–41.
- 762 **Kim N, Barter JW, Sukharnikova T, Yin HH.** Striatal firing rate reflects head movement velocity. *European Journal*  
763 *of Neuroscience*. 2014; 40(10):3481–3490.
- 764 **Lavian H, Korngreen A.** Inhibitory short-term plasticity modulates neuronal activity in the rat entopeduncular  
765 nucleus in vitro. *European Journal of Neuroscience*. 2016; 43(7):870–884.
- 766 **Lillis KP, Kramer MA, Mertz J, Staley KJ, White JA.** Pyramidal cells accumulate chloride at seizure onset. *Neurobi-*  
767 *ology of disease*. 2012; 47(3):358–366.
- 768 **Mahadevan V, Woodin MA.** Regulation of neuronal chloride homeostasis by neuromodulators. *The Journal of*  
769 *physiology*. 2016; 594(10):2593–2605.
- 770 **Mailly P, Charpier S, Menetrey A, Deniau JM.** Three-dimensional organization of the recurrent axon collateral  
771 network of the substantia nigra pars reticulata neurons in the rat. *Journal of Neuroscience*. 2003; 23(12):5247–  
772 5257.
- 773 **Martin LP, Waszczak BL.** Dopamine D2 receptor-mediated modulation of the GABAergic inhibition of substantia  
774 nigra pars reticulata neurons. *Brain research*. 1996; 729(2):156–169.
- 775 **Mastro KJ, Bouchard RS, Holt HA, Gittis AH.** Transgenic mouse lines subdivide external segment of the globus  
776 pallidus (GPe) neurons and reveal distinct GPe output pathways. *Journal of Neuroscience*. 2014; 34(6):2087–  
777 2099.
- 778 **Mastro KJ, Zitelli KT, Willard AM, Leblanc KH, Kravitz AV, Gittis AH.** Cell-specific pallidal intervention induces  
779 long-lasting motor recovery in dopamine-depleted mice. *Nature neuroscience*. 2017; 20(6):815.
- 780 **Moore YE, Kelley MR, Brandon NJ, Deeb TZ, Moss SJ.** Seizing control of KCC2: a new therapeutic target for  
781 epilepsy. *Trends in neurosciences*. 2017; 40(9):555–571.

- 782 **Morrison A**, Diesmann M, Gerstner W. Phenomenological models of synaptic plasticity based on spike timing.  
783 *Biological cybernetics*. 2008; 98(6):459–478.
- 784 **Phoka E**, Cuntz H, Roth A, Häusser M. A new approach for determining phase response curves reveals that  
785 Purkinje cells can act as perfect integrators. *PLoS computational biology*. 2010; 6(4):e1000768.
- 786 **Raimondo JV**, Markram H, Akerman CJ. Short-term ionic plasticity at GABAergic synapses. *Frontiers in synaptic*  
787 *neuroscience*. 2012; 4:5.
- 788 **Ratté S**, Prescott SA. CIC-2 channels regulate neuronal excitability, not intracellular chloride levels. *Journal of*  
789 *Neuroscience*. 2011; 31(44):15838–15843.
- 790 **Richards C**, Shiroyama T, Kitai S. Electrophysiological and immunocytochemical characterization of GABA and  
791 dopamine neurons in the substantia nigra of the rat. *Neuroscience*. 1997; 80(2):545–557.
- 792 **Sato M**, Hikosaka O. Role of primate substantia nigra pars reticulata in reward-oriented saccadic eye movement.  
793 *Journal of Neuroscience*. 2002; 22(6):2363–2373.
- 794 **Schulte JT**, Wierenga CJ, Bruining H. Chloride transporters and GABA polarity in developmental, neurological  
795 and psychiatric conditions. *Neuroscience & Biobehavioral Reviews*. 2018; 90:260–271.
- 796 **Shires J**, Joshi S, Basso MA. Shedding new light on the role of the basal ganglia-superior colliculus pathway in  
797 eye movements. *Current opinion in neurobiology*. 2010; 20(6):717–725.
- 798 **Simmons D**, Higgs MH, Leiby S, Wilson CJ. Predicting responses to inhibitory synaptic input in substantia nigra  
799 pars reticulata neurons. *Journal of neurophysiology*. 2018; 120(5):2679–2693.
- 800 **Sivakumaran S**, Cardarelli RA, Maguire J, Kelley MR, Silayeva L, Morrow DH, Mukherjee J, Moore YE, Mather  
801 RJ, Duggan ME, et al. Selective inhibition of KCC2 leads to hyperexcitability and epileptiform discharges in  
802 hippocampal slices and in vivo. *Journal of Neuroscience*. 2015; 35(21):8291–8296.
- 803 **Smeal RM**, Ermentrout GB, White JA. Phase-response curves and synchronized neural networks. *Philosophical*  
804 *Transactions of the Royal Society B: Biological Sciences*. 2010; 365(1551):2407–2422.
- 805 **Smith Y**, Bolam J. Convergence of synaptic inputs from the striatum and the globus pallidus onto identified  
806 nigrocollicular cells in the rat: a double anterograde labelling study. *Neuroscience*. 1991; 44(1):45–73.
- 807 **Staley KJ**, Proctor WR. Modulation of mammalian dendritic GABA<sub>A</sub> receptor function by the kinetics of Cl<sup>-</sup> and  
808 HCO<sub>3</sub><sup>-</sup> transport. *The Journal of physiology*. 1999; 519(3):693–712.
- 809 **Staley KJ**, Soldo BL, Proctor WR. Ionic mechanisms of neuronal excitation by inhibitory GABA<sub>A</sub> receptors.  
810 *Science*. 1995; 269(5226):977–981.
- 811 **van Stockum S**, MacAskill MR, Myall D, Anderson TJ. A perceptual discrimination task results in greater  
812 facilitation of voluntary saccades in Parkinson's disease patients. *European Journal of Neuroscience*. 2013;  
813 37(1):163–172.
- 814 **Surmeier DJ**, Mercer JN, Chan CS. Autonomous pacemakers in the basal ganglia: who needs excitatory synapses  
815 anyway? *Current opinion in neurobiology*. 2005; 15(3):312–318.
- 816 **Thounaojam US**, Cui J, Norman SE, Butera RJ, Canavier CC. Slow noise in the period of a biological oscillator  
817 underlies gradual trends and abrupt transitions in phasic relationships in hybrid neural networks. *PLoS*  
818 *computational biology*. 2014; 10(5):e1003622.
- 819 **Titz S**, Sammler EM, Hormuzdi SG. Could tuning of the inhibitory tone involve graded changes in neuronal  
820 chloride transport? *Neuropharmacology*. 2015; 95:321–331.
- 821 **Tsubo Y**, Takada M, Reyes AD, Fukai T. Layer and frequency dependencies of phase response properties of  
822 pyramidal neurons in rat motor cortex. *European Journal of Neuroscience*. 2007; 25(11):3429–3441.
- 823 **Van Stockum S**, MacAskill MR, Myall D, Anderson TJ. A perceptual discrimination task abnormally facilitates  
824 reflexive saccades in Parkinson's disease. *European Journal of Neuroscience*. 2011; 33(11):2091–2100.
- 825 **Von Krosigk M**, Smith Y, Bolam J, Smith A. Synaptic organization of GABAergic inputs from the striatum and  
826 the globus pallidus onto neurons in the substantia nigra and retrorubral field which project to the medullary  
827 reticular formation. *Neuroscience*. 1992; 50(3):531–549.

- 828 **Walters JR**, Hu D, Itoga CA, Parr-Brownlie LC, Bergstrom DA. Phase relationships support a role for coordinated  
829 activity in the indirect pathway in organizing slow oscillations in basal ganglia output after loss of dopamine.  
830 *Neuroscience*. 2007; 144(2):762–776.
- 831 **Wei W**, Rubin JE, Wang XJ. Role of the indirect pathway of the basal ganglia in perceptual decision making.  
832 *Journal of Neuroscience*. 2015; 35(9):4052–4064.
- 833 **Whalen T**, Willard A, Rubin J, Gittis A, Delta Oscillations Are a Robust Biomarker of Dopamine Depletion Severity  
834 and Motor Dysfunction in Awake Mice; 2020. In review.
- 835 **Wichmann T**, Kliem MA, Soares J. Slow oscillatory discharge in the primate basal ganglia. *Journal of neurophysi-*  
836 *ology*. 2002; 87(2):1145–1148.
- 837 **Willard AM**, Isett BR, Whalen TC, Mastro KJ, Ki CS, Mao X, Gittis AH. State transitions in the substantia nigra  
838 reticulata predict the onset of motor deficits in models of progressive dopamine depletion in mice. *eLife*.  
839 2019; 8:e42746.
- 840 **Xia XM**, Fakler B, Rivard A, Wayman G, Johnson-Pais T, Keen J, Ishii T, Hirschberg B, Bond C, Lutsenko S, et al.  
841 Mechanism of calcium gating in small-conductance calcium-activated potassium channels. *Nature*. 1998;  
842 395(6701):503.
- 843 **Yanovsky Y**, Velte S, Misgeld U. Ca<sup>2+</sup> release-dependent hyperpolarizations modulate the firing pattern of  
844 juvenile GABA neurons in mouse substantia nigra pars reticulata in vitro. *The Journal of physiology*. 2006;  
845 577(3):879–890.
- 846 **Zhou FW**, Matta SG, Zhou FM. Constitutively active TRPC3 channels regulate basal ganglia output neurons.  
847 *Journal of Neuroscience*. 2008; 28(2):473–482.
